# Supplementary material for: Photoinduced efficient synthesis of cyanoalkylsulfonylated oxindoles via sulfur dioxide insertion
Source: Royal Society of Chemistry journal article supplement (doi:10.1039/d1ob01466h), 2021-01-01

## **Photoinduced efficient synthesis of cyanoalkylsulfonlated oxindoles via sulfur dioxide insertion**

Fan Teng, †<sup>a</sup> Juan Du, †<sup>ab</sup> Changping Xun,<sup>a</sup> Mengxue Zhu,<sup>a</sup> Ziqin Lu,<sup>a</sup> Hongmei Jiang,<sup>a</sup> Yuling Chen,<sup>a</sup> Yu Li<sup>a</sup> and Qing-Wen Gui \*<sup>a</sup>

<sup>a</sup> College of Chemistry and Materials Science, Hunan Agricultural University, Changsha 410128, China

<sup>b</sup> International Joint Research Centre for Molecular Science, College of Chemistry and Environmental Engineering, Shenzhen University, Shenzhen, 518060, China; College of Chemistry and Materials Science, Hunan Agricultural University, Changsha 410128, China

E-mail: gqw1216@163.com

### **Table of Content**

|                                                                                    |            |
|------------------------------------------------------------------------------------|------------|
| <b>1. General Information</b>                                                      | <b>S2</b>  |
| <b>2. Experimental Section</b>                                                     | <b>S3</b>  |
| <b>3. Characterization Data of Products</b>                                        | <b>S7</b>  |
| <b>4. References</b>                                                               | <b>S17</b> |
| <b>5. <sup>1</sup>H, <sup>13</sup>C and <sup>19</sup>F NMR Spectra of Products</b> | <b>S18</b> |

## 1. General Information

All reactions were carried out in anhydrous solvent and commercially available reagents were used as received unless otherwise stated. Analytical thin layer chromatography (TLC) was performed on precoated aluminium-backed silica gel 60 F<sub>254</sub> plates (EMD Millipore, 200  $\mu$ m thickness). Flash column chromatography was performed using Tsingtao silica gel (200-300). <sup>1</sup>H, <sup>13</sup>C and <sup>19</sup>F NMR spectra were recorded on a Bruker Avance DRX - 400 spectrometers; chemical shifts ( $\delta$ ) are given in ppm and calibrated using the signal of residual undeuterated solvent as internal reference (CDCl<sub>3</sub>:  $\delta_{\text{H}}$  = 7.26 ppm and  $\delta_{\text{C}}$  = 77.16 ppm). Data for <sup>1</sup>H NMR, <sup>13</sup>C and <sup>19</sup>F NMR are reported as follows: chemical shift ( $\delta$ , ppm), multiplicity, integration, and coupling constant (Hz).

### The Light Source and the Material of the Irradiation Vessel

Manufacturer: Beijin Rogertech Ltd.

Model: RLH-18

Wavelength range: 365 nm – 440 nm

Material of the irradiation vessel: quartz tube

Not use any filters

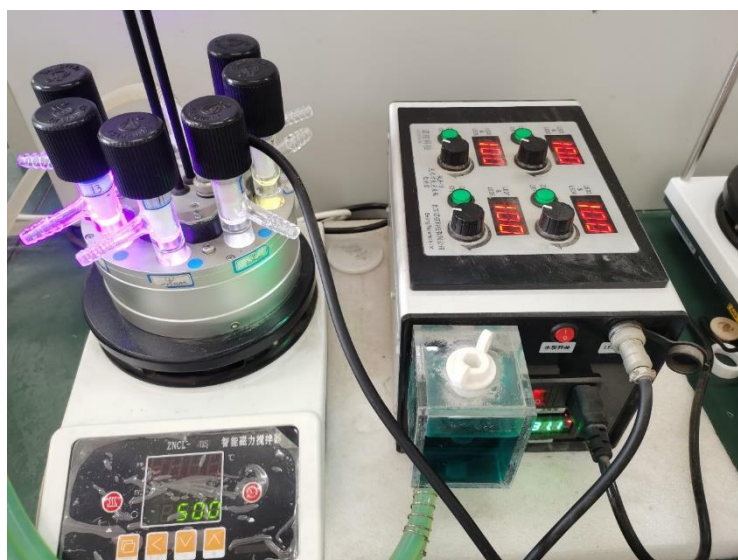

Figure S1

## 2. Experimental Section

### (1) General experimental procedures for compound 3a-3x

In a vial was placed *N*-arylmethacrylamides (0.2 mmol), cycloketone oxime esters (0.3 mmol),  $K_2S_2O_5$  (0.4 mmol) and 2 mL MeOH, then the contents were reacted under nitrogen atmosphere and irradiated by 10 W LED for 12 h at room temperature. Upon completion, the reaction mixture was quenched by addition of 10 mL of water. The aqueous layer was extracted three times with EtOAc (10 mL  $\times$  3), and the combine organic layers were washed with saturated sodium sulfite solution and dried over anhydrous sodium sulfate, evaporated to dryness, and purified by column chromatography on silica gel (60-120 mesh) using petroleum ether: ethyl acetate = 1:1 as an eluent to afford the desired products.

### (2) Unsuccessful substrates

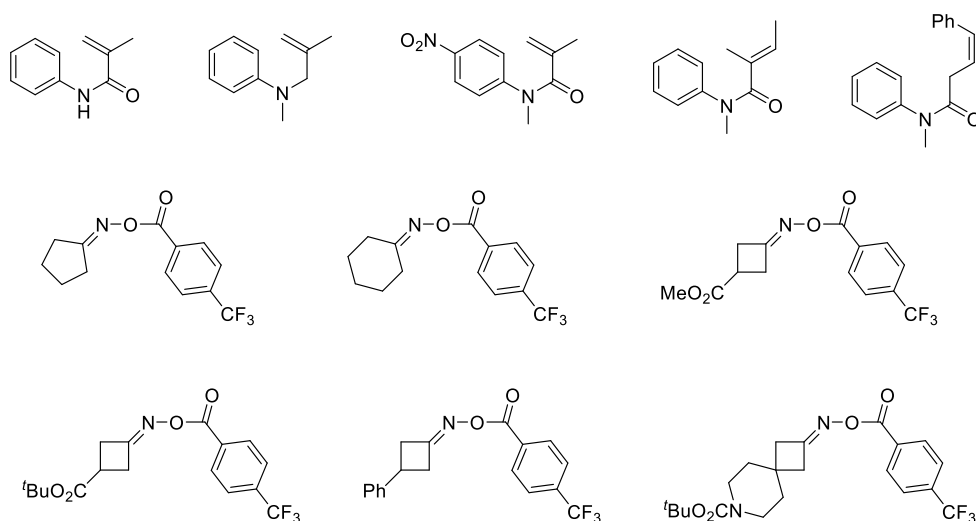

### (3) Test of the evolution of $SO_2$ gas

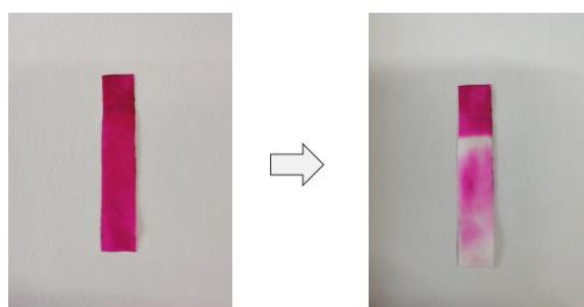

Figure S2

A piece of test strip prepared from magenta solution was put into the reaction tube and sealed. After the completion of the reaction, the magenta was faded rapidly (Figure S2).

**(4) Wavelength optimization for 2b-2e**

**Table S1** the yields of **3a** with irradiation wavelength of visible-light (R = C<sub>6</sub>H<sub>5</sub>CO)

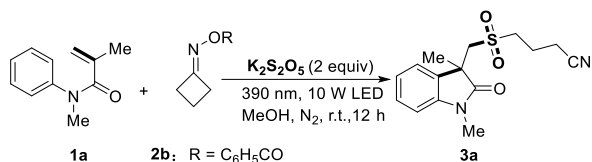

| Entry | Variation from the standard conditions <sup>a</sup> | Yield (%) <sup>b</sup> |
|-------|-----------------------------------------------------|------------------------|
| 1     | None                                                | 76                     |
| 2     | 365 nm instead of 390 nm                            | 15                     |
| 3     | 375 nm instead of 390 nm                            | 21                     |
| 4     | 385 nm instead of 390 nm                            | 46                     |
| 5     | 395 nm instead of 390 nm                            | 67                     |
| 6     | 400 nm instead of 390 nm                            | 57                     |
| 7     | 405 nm instead of 390 nm                            | 48                     |
| 8     | 410 nm instead of 390 nm                            | 12                     |
| 9     | 415 nm instead of 390 nm                            | 8                      |
| 10    | 425 nm instead of 390 nm                            | trace                  |
| 11    | 440 nm instead of 390 nm                            | N.R.                   |
| 12    | In dark                                             | N.R.                   |

<sup>a</sup>Reaction conditions: **1a** (0.2 mmol), **2b** (1.5 equiv), K<sub>2</sub>S<sub>2</sub>O<sub>5</sub> (2 equiv), solvents (1.5 mL), under N<sub>2</sub> at room temperature for 12 h. <sup>b</sup>Isolated yield.

**Table S2** the yields of **3a** with irradiation wavelength of visible-light (R = *p*-NO<sub>2</sub>C<sub>6</sub>H<sub>5</sub>CO)

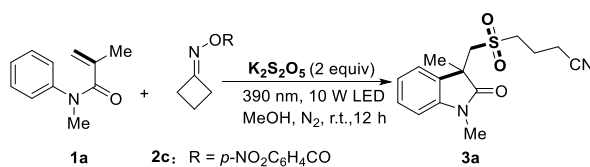

| Entry | Variation from the standard conditions <sup>a</sup> | Yield (%) <sup>b</sup> |
|-------|-----------------------------------------------------|------------------------|
| 1     | None                                                | 36                     |
| 2     | 365 nm instead of 390 nm                            | 5                      |
| 3     | 375 nm instead of 390 nm                            | 12                     |
| 4     | 385 nm instead of 390 nm                            | 35                     |
| 5     | 395 nm instead of 390 nm                            | 36                     |
| 6     | 400 nm instead of 390 nm                            | 30                     |
| 7     | 405 nm instead of 390 nm                            | 18                     |
| 8     | 410 nm instead of 390 nm                            | trace                  |
| 9     | 415 nm instead of 390 nm                            | trace                  |
| 10    | 425 nm instead of 390 nm                            | N.R.                   |
| 11    | 440 nm instead of 390 nm                            | N.R.                   |
| 12    | In dark                                             | N.R.                   |

<sup>a</sup>Reaction conditions: **1a** (0.2 mmol), **2c** (1.5 equiv), K<sub>2</sub>S<sub>2</sub>O<sub>5</sub> (2 equiv), solvents (1.5 mL), under N<sub>2</sub> at room temperature for 12 h. <sup>b</sup>Isolated yield.

**Table S3** the yields of **3a** with irradiation wavelength of visible-light (R = *p*-FC<sub>6</sub>H<sub>5</sub>CO)

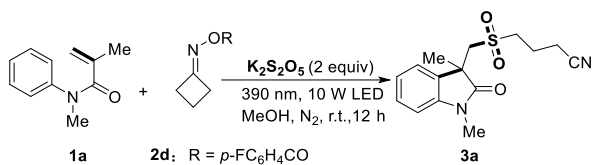

| Entry | Variation from the standard conditions <sup>a</sup> | Yield (%) <sup>b</sup> |
|-------|-----------------------------------------------------|------------------------|
| 1     | None                                                | 29                     |
| 2     | 365 nm instead of 390 nm                            | N.R.                   |
| 3     | 375 nm instead of 390 nm                            | 5                      |
| 4     | 385 nm instead of 390 nm                            | 14                     |
| 5     | 395 nm instead of 390 nm                            | 28                     |
| 6     | 400 nm instead of 390 nm                            | 25                     |
| 7     | 405 nm instead of 390 nm                            | 10                     |
| 8     | 410 nm instead of 390 nm                            | trace                  |
| 9     | 415 nm instead of 390 nm                            | trace                  |
| 10    | 425 nm instead of 390 nm                            | N.R.                   |
| 11    | 440 nm instead of 390 nm                            | N.R.                   |
| 12    | In dark                                             | N.R.                   |

<sup>a</sup>Reaction conditions: **1a** (0.2 mmol), **2d** (1.5 equiv), K<sub>2</sub>S<sub>2</sub>O<sub>5</sub> (2 equiv), solvents (1.5 mL), under N<sub>2</sub> at room temperature for 12 h. <sup>b</sup>Isolated yield.

**Table S4** the yields of **3a** with irradiation wavelength of visible-light (R = *p*-MeC<sub>6</sub>H<sub>5</sub>CO)

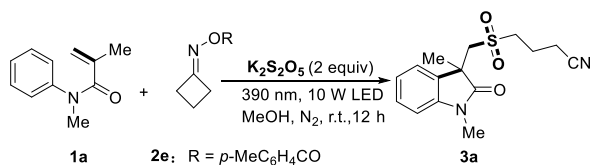

| Entry | Variation from the standard conditions <sup>a</sup> | Yield (%) <sup>b</sup> |
|-------|-----------------------------------------------------|------------------------|
| 1     | None                                                | trace                  |
| 2     | 365 nm instead of 390 nm                            | N.R.                   |
| 3     | 375 nm instead of 390 nm                            | N.R.                   |
| 4     | 385 nm instead of 390 nm                            | trace                  |
| 5     | 395 nm instead of 390 nm                            | trace                  |
| 6     | 400 nm instead of 390 nm                            | trace                  |
| 7     | 405 nm instead of 390 nm                            | trace                  |
| 8     | 410 nm instead of 390 nm                            | trace                  |
| 9     | 415 nm instead of 390 nm                            | N.R.                   |
| 10    | 425 nm instead of 390 nm                            | N.R.                   |
| 11    | 440 nm instead of 390 nm                            | N.R.                   |
| 12    | In dark                                             | N.R.                   |

<sup>a</sup>Reaction conditions: **1a** (0.2 mmol), **2e** (1.5 equiv), K<sub>2</sub>S<sub>2</sub>O<sub>5</sub> (2 equiv), solvents (1.5 mL), under N<sub>2</sub> at room temperature for 12 h. <sup>b</sup>Isolated yield.

(5) UV-visible absorption spectra

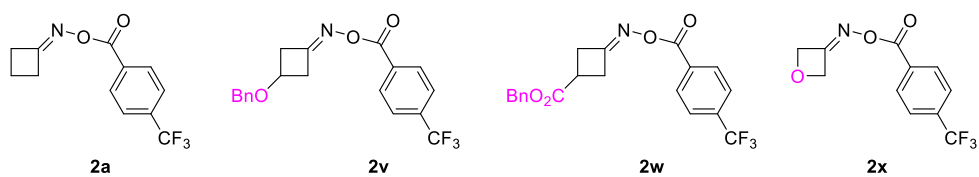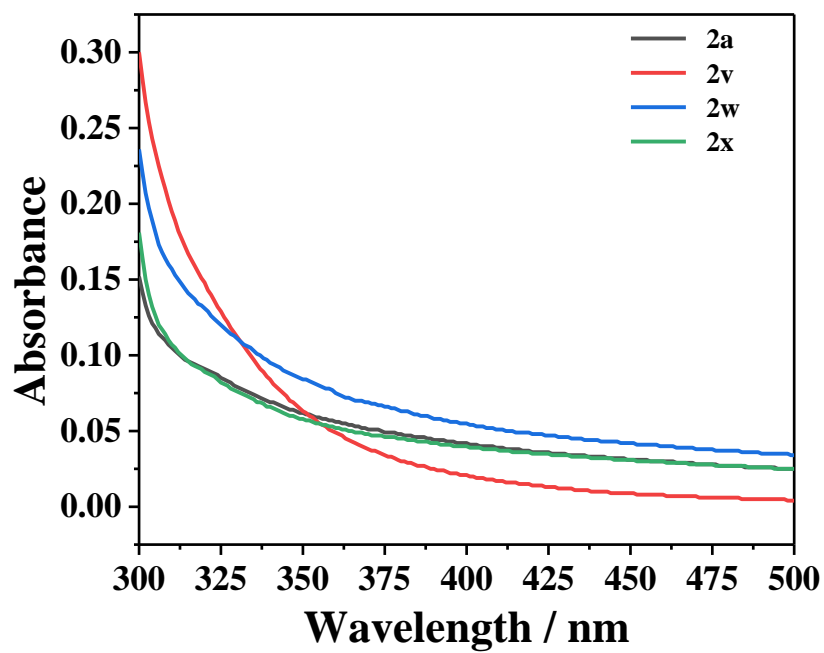

Figure S3 Absorption spectra of 2a, 2v, 2w and 2x (0.1M dissolved in MeOH)

### 3. Characterization data of products

#### 4-(((1,3-dimethyl-2-oxoindolin-3-yl)methyl)sulfonyl)butanenitrile (3a)<sup>1</sup>

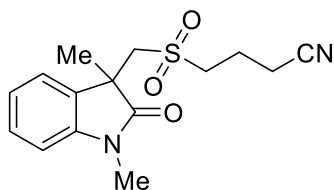

White solid (58.8 mg, 96%), mp: 147.8-148.5 °C; <sup>1</sup>H NMR (400 MHz, CDCl<sub>3</sub>): δ 7.36 – 7.34 (m, 2 H), 7.14 (td, *J* = 7.6 Hz, 0.8 Hz, 1 H), 7.14 (d, *J* = 7.6 Hz, 1 H), 3.72 (d, *J* = 14.8 Hz, 1 H), 3.57 (d, *J* = 14.6 Hz, 1 H), 3.27 (s, 3 H), 2.94 – 2.87 (m, 1 H), 2.84 – 2.76 (m, 1 H), 2.49 (td, *J* = 7.2 Hz, 3.2 Hz, 2 H), 2.11 – 2.04 (m, 2 H), 1.46 (s, 3 H); <sup>13</sup>C NMR (101 MHz, CDCl<sub>3</sub>): δ 177.87, 143.40, 130.11, 129.35, 123.50, 122.92, 118.20, 109.10, 59.65, 53.02, 45.61, 26.79, 25.23, 18.15, 16.32.

#### 4-(((1,3-dimethyl-2-oxo-5-phenylindolin-3-yl)methyl)sulfonyl)butanenitrile (3b)

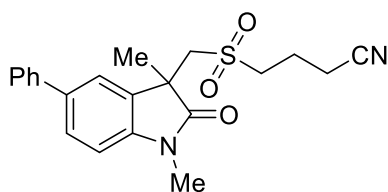

Yellow solid (62.7 mg, 82%), mp: 125.2-125.7 °C; <sup>1</sup>H NMR (400 MHz, CDCl<sub>3</sub>): δ 7.59 – 7.55 (m, 4 H), 7.43 (t, *J* = 7.6 Hz, 2 H), 7.33 (t, *J* = 7.2 Hz, 1 H), 6.98 (d, *J* = 8.8 Hz, 1 H), 3.74 (d, *J* = 14.8 Hz, 1 H), 3.62 (d, *J* = 14.8 Hz, 1 H), 3.29 (s, 3 H), 2.97 – 2.82 (m, 2 H), 2.45 (t, *J* = 7.2 Hz, 2 H), 2.07 (t, *J* = 7.2 Hz, 2 H), 1.50 (s, 3 H); <sup>13</sup>C NMR (101 MHz, CDCl<sub>3</sub>): δ 177.92, 142.68, 140.67, 136.36, 130.81, 128.99, 128.09, 127.30, 126.99, 122.59, 118.17, 109.25, 59.54, 53.11, 45.79, 26.90, 25.29, 18.11, 16.27; HRMS (ESI) *m/z* calcd. for C<sub>21</sub>H<sub>23</sub>N<sub>2</sub>O<sub>3</sub>S [M+H]<sup>+</sup> : 383.1424, found 383.1427.

#### 4-(((1,3,5-trimethyl-2-oxoindolin-3-yl)methyl)sulfonyl)butanenitrile (3c)<sup>1</sup>

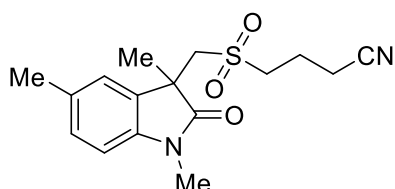

White solid (50.6 mg, 79%), mp: 123.9-124.6 °C; <sup>1</sup>H NMR (400 MHz, CDCl<sub>3</sub>): δ 7.19 – 7.12 (m, 2 H), 7.18 (d, *J* = 1.6 Hz, 1 H), 3.69 (d, *J* = 14.8 Hz, 1 H), 3.54 (d, *J* = 14.8 Hz, 1 H), 3.23 (s, 3 H), 2.94 – 2.87 (m, 1 H), 2.84 – 2.77 (m, 1 H), 2.48 (dt, *J* = 14.8, 2.4 Hz, 2 H), 2.36 (s, 3

H), 2.07 (t,  $J = 7.6$  Hz, 2 H), 1.43 (s, 3 H);  $^{13}\text{C}$  NMR (101 MHz,  $\text{CDCl}_3$ ):  $\delta$  177.75, 140.98, 132.55, 130.24, 129.58, 124.21, 118.18, 108.81, 59.68, 53.04, 45.72, 26.80, 25.31, 21.30, 18.13, 16.33.

**4-(((5-(tert-butyl)-1,3-dimethyl-2-oxoindolin-3-yl)methyl)sulfonyl)butanenitrile (3d)<sup>1</sup>**

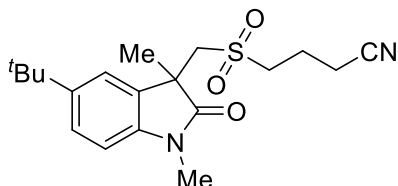

Yellow solid (62.3 mg, 86%), mp: 107.2-107.8 °C;  $^1\text{H}$  NMR (400 MHz,  $\text{CDCl}_3$ ):  $\delta$  7.38 – 7.34 (m, 2 H), 6.53 (d,  $J = 8.0$  Hz, 1 H), 3.69 (d,  $J = 14.4$  Hz, 1 H), 3.61 (d,  $J = 14.8$  Hz, 1 H), 3.23 (s, 3 H), 2.91 – 2.84 (m, 1 H), 2.71 – 2.64 (m, 1 H), 2.48 – 2.40 (m, 2 H), 2.05 – 2.02 (m, 2 H), 1.45 (s, 3 H), 1.31 (s, 9 H);  $^{13}\text{C}$  NMR (101 MHz,  $\text{CDCl}_3$ ):  $\delta$  177.91, 145.97, 140.89, 129.67, 125.68, 120.89, 118.23, 108.35, 59.66, 52.85, 45.73, 34.65, 31.58, 26.69, 25.01, 17.92, 16.18.

**4-(((1,3-dimethyl-2-oxo-5-phenoxyindolin-3-yl)methyl)sulfonyl)butanenitrile (3e)<sup>1</sup>**

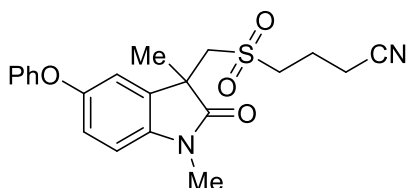

White oil (73.3 mg, 92%);  $^1\text{H}$  NMR (400 MHz,  $\text{CDCl}_3$ ):  $\delta$  7.32 – 7.28 (m, 2 H), 7.11 (d,  $J = 2.3$  Hz, 1 H), 7.05 (t,  $J = 7.4$  Hz, 1 H), 7.00 (dd,  $J = 8.4$  Hz, 2.4 Hz, 1 H), 6.98 – 6.93 (m, 2H), 6.86 (d,  $J = 8.4$  Hz, 1 H), 3.71 (d,  $J = 14.6$  Hz, 1 H), 3.53 (d,  $J = 14.6$  Hz, 1 H), 3.24 (s, 3 H), 2.99 – 2.84 (m, 2 H), 2.47 (t,  $J = 7.2$  Hz, 2 H), 2.10 – 2.02 (m, 2 H), 1.41 (s, 3 H);  $^{13}\text{C}$  NMR (101 MHz,  $\text{CDCl}_3$ ):  $\delta$  177.68, 158.07, 152.35, 139.10, 131.67, 129.78, 122.84, 120.11, 118.31, 117.70, 116.28, 109.61, 58.90, 52.90, 45.71, 26.79, 25.21, 18.03, 16.10.

**4-(((5-methoxy-1,3-dimethyl-2-oxoindolin-3-yl)methyl)sulfonyl)butanenitrile (3f)<sup>1</sup>**

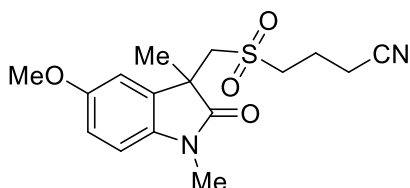

Yellow oil (54.5 mg, 81%);  $^1\text{H}$  NMR (400 MHz,  $\text{CDCl}_3$ ):  $\delta$  7.00 – 6.97 (m, 1 H), 6.89 – 6.81 (m, 2 H), 3.81 (s, 3 H), 3.71 (d,  $J = 14.8$  Hz, 1 H), 3.58 (d,  $J = 14.7$  Hz, 1 H), 3.24 (s, 3 H),



2.98 – 2.82 (m, 2 H), 2.50 (t,  $J = 7.2$  Hz, 2 H), 2.12 – 2.05 (m, 2 H), 1.45 (s, 3 H);  $^{13}\text{C}$  NMR (101 MHz,  $\text{CDCl}_3$ ):  $\delta$  177.45, 156.21, 136.72, 131.60, 118.21, 113.09, 111.29, 109.35, 60.51, 55.93, 53.05, 46.07, 26.85, 25.29, 18.14, 16.31.

**4-(((1,3-dimethyl-2-oxo-5-(trifluoromethoxy)indolin-3-yl)methyl)sulfonyl)butanenitrile (3g)**

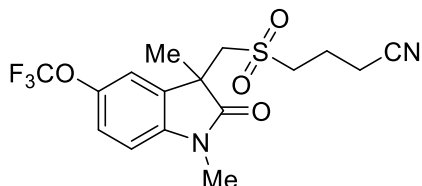

White solid (57.7 mg, 72%, mp: 150.6-151.1 °C);  $^1\text{H}$  NMR (400 MHz,  $\text{CDCl}_3$ ):  $\delta$  7.27 – 7.22 (m, 2 H), 6.91 (d,  $J = 8.4$  Hz, 1 H), 3.75 (d,  $J = 14.6$  Hz, 1 H), 3.59 (s, 1 H), 3.27 (s, 3 H), 2.03 – 2.85 (m, 2 H), 2.52 (t,  $J = 7.2$  Hz, 2 H), 2.11 (t,  $J = 7.2$  Hz, 2 H), 1.48 (s, 3H);  $^{13}\text{C}$  NMR (101 MHz,  $\text{CDCl}_3$ ):  $\delta$  177.75, 144.84 (t,  $J = 1.9$  Hz, 1 C), 142.03, 131.66, 130.64, 122.45, 118.14, 117.93, 109.52, 59.28, 53.17, 45.91, 26.99, 25.17, 18.07, 16.30;  $^{19}\text{F}$  NMR (376 MHz,  $\text{CDCl}_3$ ):  $\delta$  -58.29 (s, 3 F); HRMS (ESI)  $m/z$  calcd. for  $\text{C}_{16}\text{H}_{18}\text{F}_3\text{N}_2\text{O}_4\text{S}$   $[\text{M}+\text{H}]^+$  : 391.0934, found 391.0941.

**4-(((5-fluoro-1,3-dimethyl-2-oxoindolin-3-yl)methyl)sulfonyl)butanenitrile (3h)<sup>1</sup>**

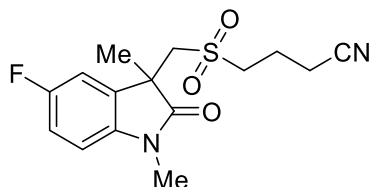

White solid (46.7 mg, 72%, mp: 160.1-160.7 °C);  $^1\text{H}$  NMR (400 MHz,  $\text{CDCl}_3$ ):  $\delta$  7.13 (dd,  $J = 7.8$  Hz, 2.6 Hz, 1 H), 7.05 (td,  $J = 9.0$  Hz, 2.6 Hz, 1 H), 6.84 (dd,  $J = 8.6$  Hz, 4.2 Hz, 1 H), 3.73 (d,  $J = 14.6$  Hz, 1 H), 3.57 (s, 1 H), 3.25 (s, 3 H), 3.05 – 2.91 (m, 2 H), 2.53 (t,  $J = 7.2$  Hz, 2 H), 2.15 – 2.09 (m, 2 H), 1.46 (s, 3 H);  $^{13}\text{C}$  NMR (101 MHz,  $\text{CDCl}_3$ ):  $\delta$  177.66, 159.34 (d,  $J = 242.6$  Hz, 1 C), 139.18, 131.88 (d,  $J = 8.2$  Hz, 1 C), 118.20, 115.53 (d,  $J = 23.6$  Hz, 1 C), 111.93 (d,  $J = 25.0$  Hz, 1 C), 109.60 (d,  $J = 8.2$  Hz, 1 C), 59.18, 53.12, 46.07 (d,  $J = 1.5$  Hz, 1 C), 26.95, 25.27, 18.11, 16.32;  $^{19}\text{F}$  NMR (376 MHz,  $\text{CDCl}_3$ ):  $\delta$  -119.41 (s, 1 F).

**4-(((5-chloro-1,3-dimethyl-2-oxoindolin-3-yl)methyl)sulfonyl)butanenitrile (3i)<sup>1</sup>**

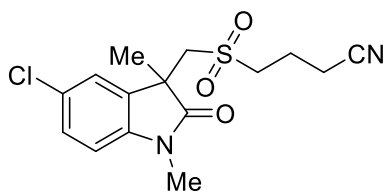

Grey solid (54.4 mg, 72%, mp: 156.0-156.5 °C);  $^1\text{H}$  NMR (400 MHz,  $\text{CDCl}_3$ ):  $\delta$  7.35 – 7.29 (m, 2 H), 6.83 (d,  $J$  = 8.4 Hz, 1 H), 3.71 (d,  $J$  = 14.8 Hz, 1 H), 3.56 (d,  $J$  = 14.8 Hz, 1 H), 3.24 (s, 3 H), 3.03 – 2.88 (m, 2 H), 2.51 (t,  $J$  = 7.2 Hz, 2 H), 2.13 – 2.06 (m, 2 H), 1.44 (s, 3 H);  $^{13}\text{C}$  NMR (101 MHz,  $\text{CDCl}_3$ ):  $\delta$  177.45, 141.87, 131.98, 129.14, 128.24, 124.13, 118.21, 109.97, 59.15, 53.14, 45.79, 26.90, 25.25, 18.11, 16.29.

**4-(((5-bromo-1,3-dimethyl-2-oxoindolin-3-yl)methyl)sulfonyl)butanenitrile (3j)<sup>1</sup>**

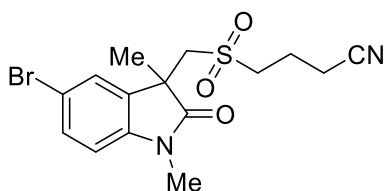

White oil (58.4 mg, 76%);  $^1\text{H}$  NMR (400 MHz,  $\text{CDCl}_3$ ):  $\delta$  7.51 – 7.40 (m, 2 H), 6.79 (d,  $J$  = 8.2 Hz, 1 H), 3.72 (d,  $J$  = 14.8 Hz, 1 H), 3.57 (d,  $J$  = 14.8 Hz, 1 H), 3.23 (s, 3 H), 3.02 – 2.89 (m, 2 H), 2.51 (t,  $J$  = 7.2 Hz, 2 H), 2.15 – 2.06 (m, 2 H), 1.44 (s, 3 H);  $^{13}\text{C}$  NMR (101 MHz,  $\text{CDCl}_3$ ):  $\delta$  177.40, 142.35, 132.36, 132.04, 126.85, 118.22, 115.47, 110.49, 59.12, 53.15, 45.74, 26.89, 25.23, 18.12, 16.29.

**4-(((5-iodo-1,3-dimethyl-2-oxoindolin-3-yl)methyl)sulfonyl)butanenitrile (3k)<sup>1</sup>**

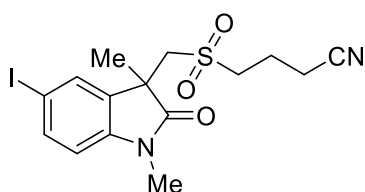

Yellow solid (62.8 mg, 80%, mp: 108.2-108.7 °C);  $^1\text{H}$  NMR (400 MHz,  $\text{CDCl}_3$ ):  $\delta$  7.66 – 7.54 (m, 2 H), 6.69 (d,  $J$  = 8.2 Hz, 1 H), 3.71 (d,  $J$  = 14.8 Hz, 1 H), 3.56 (d,  $J$  = 14.8 Hz, 1 H), 3.22 (s, 3 H), 2.98 – 2.86 (m, 2 H), 2.51 (t,  $J$  = 7.2 Hz, 2 H), 2.15 – 2.05 (m, 2 H), 1.43 (s, 3 H);  $^{13}\text{C}$  NMR (101 MHz,  $\text{CDCl}_3$ ):  $\delta$  177.22, 143.06, 137.97, 132.69, 132.33, 118.22, 111.06, 85.20, 59.12, 53.15, 45.53, 26.83, 25.21, 18.13, 16.30.

**4-(((1,3-dimethyl-2-oxo-5-(trifluoromethyl)indolin-3-yl)methyl)sulfonyl)butanenitrile (3l)<sup>1</sup>**

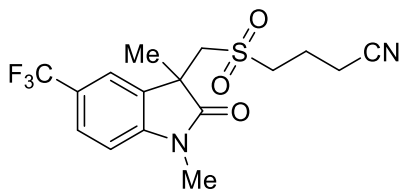

Yellow solid (62.1 mg, 83%, mp: 59.8-60.3 °C); <sup>1</sup>H NMR (400 MHz, CDCl<sub>3</sub>): δ 7.63 – 7.60 (m, 2 H), 6.98 (d, *J* = 8.4 Hz, 1 H), 3.74 (d, *J* = 14.6 Hz, 1 H), 3.63 (d, *J* = 14.8 Hz, 1 H), 3.28 (s, 3 H), 3.03 – 2.94 (m, 1 H), 2.93 – 2.85 (m, 1 H), 2.48 (t, *J* = 7.2 Hz, 2 H), 2.11 – 2.04 (m, 2 H), 1.46 (s, 3 H); <sup>13</sup>C NMR (101 MHz, CDCl<sub>3</sub>): δ 177.94, 146.34, 130.88, 126.94 (q, *J* = 3.9 Hz, 1 C), 124.97 (q, *J* = 32.6 Hz, 1 C), 122.98, 120.82 (q, *J* = 3.7 Hz, 1 C), 118.19, 108.80, 59.06, 53.15, 45.49, 26.98, 25.18, 18.03, 16.22; <sup>19</sup>F NMR (376 MHz, CDCl<sub>3</sub>): δ - 61.31 (s, 3 F).

***methyl 3-(((3-cyanopropyl)sulfonyl)methyl)-1,3-dimethyl-2-oxoindoline-5-carboxylate (3m)***

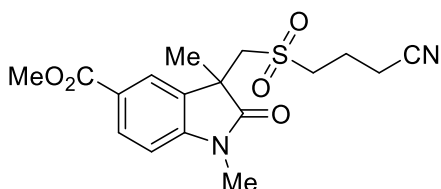

White solid (62.1 mg, 83%, mp: 59.8-60.3 °C); <sup>1</sup>H NMR (400 MHz, CDCl<sub>3</sub>): δ 8.09 (dd, *J* = 8.4 Hz, 1.4 Hz, 1 H), 8.01 (s, 1 H), 6.95 (d, *J* = 8.4 Hz, 1 H), 3.90 (s, 3 H), 3.76 (d, *J* = 14.8 Hz, 1 H), 3.64 (d, *J* = 14.8 Hz, 1 H), 3.29 (s, 3 H), 2.96 – 2.82 (m, 2 H), 2.49 (t, *J* = 7.2 Hz, 2 H), 2.11 – 2.06 (m, 2 H), 1.46 (s, 3 H); <sup>13</sup>C NMR (101 MHz, CDCl<sub>3</sub>): δ 178.25, 166.70, 147.51, 131.89, 130.25, 124.83, 124.70, 118.14, 108.65, 59.35, 53.14, 52.33, 45.39, 27.02, 25.31, 18.10, 16.29; HRMS (ESI) *m/z* calcd. for C<sub>17</sub>H<sub>21</sub>N<sub>2</sub>O<sub>5</sub>S [M+H]<sup>+</sup> : 365.1166, found 365.1171.

***3-(((3-cyanopropyl)sulfonyl)methyl)-1,3-dimethyl-2-oxoindoline-5-carbonitrile (3n)***

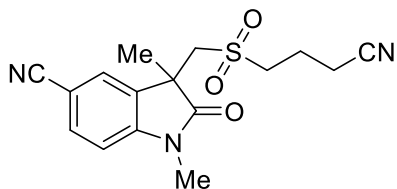

White solid (47.7 mg, 72%, mp: 116.5-117.2 °C); <sup>1</sup>H NMR (400 MHz, CDCl<sub>3</sub>): δ 7.67 (d, *J* = 8.4 Hz, 1 H), 7.64 (s, 1 H), 6.98 (d, *J* = 8.2 Hz, 1 H), 3.76 (d, *J* = 14.6 Hz, 1 H), 3.63 (d, *J* = 14.6 Hz, 1 H), 3.29 (s, 3 H), 3.11– 2.95 (m, 2 H), 2.53 (t, *J* = 7.0 Hz, 2 H), 2.15– 2.08 (m, 2 H), 1.46 (s, 3 H); <sup>13</sup>C NMR (101 MHz, CDCl<sub>3</sub>): δ 177.83, 147.18, 134.41, 131.43, 127.22,

119.10, 118.16, 109.45, 106.06, 58.93, 53.26, 45.33, 27.06, 25.24, 18.10, 16.31; HRMS (ESI)  $m/z$  calcd. for  $C_{16}H_{18}N_3O_3S$   $[M+H]^+$ : 332.1063, found 332.1068.

**4-(((1,3-dimethyl-2-oxo-2,3-dihydro-1H-benzof[f]indol-3-yl)methyl)sulfonyl)butanenitrile**

**(3o)**

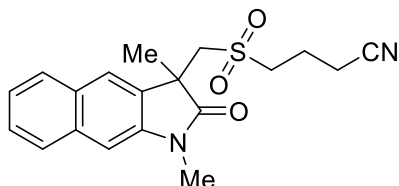

Yellow oil (59.2 mg, 83%);  $^1H$  NMR (400 MHz,  $CDCl_3$ ):  $\delta$  8.00 (dd,  $J = 12.2$  Hz, 8.6 Hz, 2 H), 7.87 (d,  $J = 8.2$  Hz, 1 H), 7.65 (t,  $J = 7.6$  Hz, 1 H), 7.47 (t,  $J = 7.6$  Hz, 1 H), 7.35 (d,  $J = 8.8$  Hz, 1 H), 4.20 (d,  $J = 14.4$  Hz, 1 H), 3.98 (d,  $J = 14.8$  Hz, 1 H), 3.44 (s, 3 H), 2.56 – 2.41 (m, 2 H), 2.21 – 2.12 (m, 2 H), 1.94 – 1.81 (m, 2 H), 1.73 (s, 3 H);  $^{13}C$  NMR (101 MHz,  $CDCl_3$ ):  $\delta$  178.93, 141.64, 130.73, 130.25, 129.31, 127.90, 126.95, 123.89, 121.08, 120.88, 118.03, 110.27, 59.44, 52.16, 46.38, 26.95, 24.36, 18.03, 15.81; HRMS (ESI)  $m/z$  calcd. for  $C_{19}H_{21}N_2O_3S$   $[M+H]^+$ : 357.1267, found 357.1270.

**4-(((1-benzyl-3-methyl-2-oxoindolin-3-yl)methyl)sulfonyl)butanenitrile (3p)<sup>1</sup>**

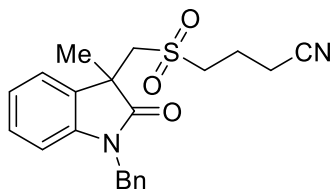

Yellow oil (60.3 mg, 79%);  $^1H$  NMR (400 MHz,  $CDCl_3$ ):  $\delta$  7.36 – 2.29 (m, 6 H), 7.21 – 7.19 (m, 1 H), 7.08 (t,  $J = 7.6$  Hz, 1 H), 6.78 (d,  $J = 7.8$  Hz, 1 H), 5.03 (d,  $J = 15.8$  Hz, 1 H), 4.87 (d,  $J = 15.6$  Hz, 1 H), 3.77 (d,  $J = 14.8$  Hz, 1 H), 3.64 (d,  $J = 14.8$  Hz, 1 H), 2.93 – 2.86 (m, 1 H), 2.83 – 2.77 (m, 1 H), 2.41 (td,  $J = 7.2$  Hz, 2.6 Hz, 2 H), 2.03 (s, 2 H), 1.49 (s, 3 H);  $^{13}C$  NMR (101 MHz,  $CDCl_3$ ):  $\delta$  177.95, 142.50, 135.66, 130.22, 129.18, 128.77, 127.65, 127.43, 123.51, 122.98, 118.22, 110.12, 59.32, 53.06, 45.72, 44.36, 25.96, 18.19, 16.28.

**4-(((3-benzyl-1-methyl-2-oxoindolin-3-yl)methyl)sulfonyl)butanenitrile (3q)<sup>1</sup>**

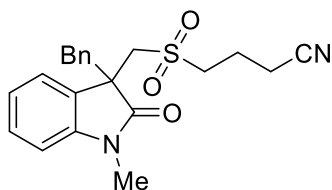

Yellow oil (57.3 mg, 75%);  $^1H$  NMR (400 MHz,  $CDCl_3$ ):  $\delta$  7.31 – 7.25 (m, 2 H), 7.17 – 7.06

(m, 4 H), 6.81 (d,  $J = 6.8$  Hz, 2 H), 6.68 (d,  $J = 8.0$  Hz, 1 H), 3.92 (d,  $J = 14.8$  Hz, 1 H), 3.72 (d,  $J = 14.8$  Hz, 1 H), 3.07 (d,  $J = 3.8$  Hz, 2 H), 3.01 (s, 3 H), 2.96 – 2.90 (m, 1 H), 2.89 – 2.80 (m, 1 H), 2.48 (td,  $J = 7.2$  Hz, 2.8 Hz, 2 H), 2.10 – 2.03 (m, 2 H);  $^{13}\text{C}$  NMR (101 MHz,  $\text{CDCl}_3$ ):  $\delta$  176.59, 143.80, 133.29, 130.11, 129.28, 127.74, 127.27, 127.23, 124.52, 122.25, 118.29, 108.67, 58.36, 53.11, 50.80, 44.50, 26.30, 18.00, 16.14.

**4-(((1,3,4,6-tetramethyl-2-oxindolin-3-yl)methyl)sulfonyl)butanenitrile (3r)**

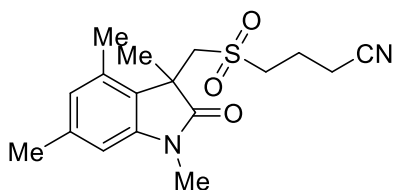

Yellow oil (50.8 mg, 76%);  $^1\text{H}$  NMR (400 MHz,  $\text{CDCl}_3$ ):  $\delta$  6.69 (s, 1 H), 6.59 (s, 1 H), 3.82 – 3.70 (m, 2 H), 3.21 (s, 3 H), 2.93 (dt,  $J = 14.4$  Hz, 7.2 Hz, 1 H), 2.87 – 2.78 (m, 1 H), 2.46 (t,  $J = 7.2$  Hz, 2 H), 2.38 (s, 3 H), 2.33 (s, 3 H), 2.07 – 2.02 (m, 2 H), 1.44 (s, 3 H);  $^{13}\text{C}$  NMR (101 MHz,  $\text{CDCl}_3$ ):  $\delta$  178.13, 143.46, 139.00, 134.29, 125.75, 123.96, 118.28, 107.53, 57.89, 52.26, 45.25, 26.61, 23.11, 21.60, 18.32, 17.76, 16.01; HRMS (ESI)  $m/z$  calcd. for  $\text{C}_{17}\text{H}_{23}\text{N}_2\text{O}_3\text{S}$   $[\text{M}+\text{H}]^+$ : 335.1424, found 335.1431.

**4-(((4,6-dichloro-1,3-dimethyl-2-oxindolin-3-yl)methyl)sulfonyl)butanenitrile (3s)**

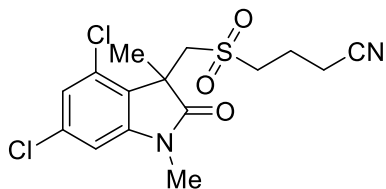

Yellow oil (68.1 mg, 91%);  $^1\text{H}$  NMR (400 MHz,  $\text{CDCl}_3$ ):  $\delta$  7.05 (d,  $J = 1.8$  Hz, 1 H), 6.83 (d,  $J = 1.8$  Hz, 1 H), 4.03 (d,  $J = 14.4$  Hz, 1 H), 3.72 (d,  $J = 14.4$  Hz, 1 H), 3.22 (s, 3 H), 3.05 – 2.02 (m, 1 H), 2.89 – 2.84 (m, 1 H), 2.51 (t,  $J = 7.2$  Hz, 2 H), 3.14 – 2.06 (m, 2 H), 1.51 (s, 3 H);  $^{13}\text{C}$  NMR (101 MHz,  $\text{CDCl}_3$ ):  $\delta$  177.41, 145.99, 135.91, 131.34, 124.87, 123.24, 118.16, 108.59, 57.13, 52.62, 46.03, 27.13, 22.21, 18.05, 16.29; HRMS (ESI)  $m/z$  calcd. for  $\text{C}_{15}\text{H}_{17}\text{Cl}_2\text{N}_2\text{O}_3\text{S}$   $[\text{M}+\text{H}]^+$ : 375.0331, found 375.0335.

**4-(((5,7-dimethyl-6-oxo-6,7-dihydro-5H-[1,3]dioxolo[4,5-f]indol-7-yl)methyl)sulfonyl)butanenitrile (3t)**

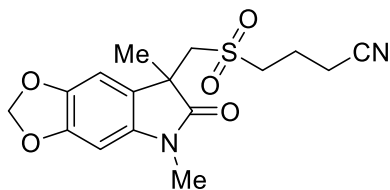

Yellow oil (49.7 mg, 71%);  $^1\text{H}$  NMR (400 MHz,  $\text{CDCl}_3$ ):  $\delta$  6.87 (s, 1 H), 6.49 (s, 1 H), 5.93 (s, 2 H), 3.64 (d,  $J = 14.6$  Hz, 1 H), 3.52 (d,  $J = 14.6$  Hz, 1 H), 3.17 (s, 3 H), 3.14 – 2.06 (m, 2 H), 2.47 (d,  $J = 7.0$  Hz, 2 H), 2.06 (d,  $J = 7.2$  Hz, 2 H), 1.37 (s, 3 H);  $^{13}\text{C}$  NMR (101 MHz,  $\text{CDCl}_3$ ):  $\delta$  177.97, 148.11, 143.37, 137.63, 121.54, 118.31, 105.03, 101.37, 92.72, 59.17, 52.81, 45.68, 26.79, 25.23, 17.88, 16.12; HRMS (ESI)  $m/z$  calcd. for  $\text{C}_{16}\text{H}_{19}\text{N}_2\text{O}_5\text{S}$   $[\text{M}+\text{H}]^+$ : 351.1009, found 351.1013.

**4-(((1-methyl-2-oxo-1,2,5,6-tetrahydro-4H-pyrrolo[3,2,1-ij]quinolin-1-yl)methyl)sulfonyl)butanenitrile (3u)**

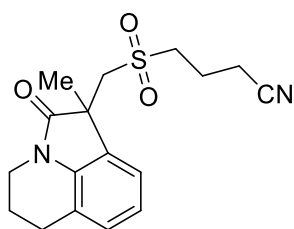

White oil (55.3 mg, 83%);  $^1\text{H}$  NMR (400 MHz,  $\text{CDCl}_3$ ):  $\delta$  7.17 (d,  $J = 7.3$  Hz, 1 H), 7.09 (d,  $J = 7.6$  Hz, 1 H), 7.00 (t,  $J = 7.6$  Hz, 1 H), 3.77 – 3.70 (m, 2 H), 3.67 (d,  $J = 14.8$  Hz, 1 H), 3.57 (d,  $J = 14.8$  Hz, 1 H), 2.91 – 2.84 (m, 1 H), 2.81 – 2.73 (m, 3 H), 2.47 (td,  $J = 7.2$  Hz, 1.8 Hz, 2 H), 2.08 – 1.99 (m, 4 H), 1.45 (s, 3 H);  $^{13}\text{C}$  NMR (101 MHz,  $\text{CDCl}_3$ ):  $\delta$  176.56, 139.22, 128.56, 128.05, 122.25, 121.28, 121.16, 118.26, 59.51, 52.88, 46.66, 39.23, 24.77, 24.58, 21.03, 18.11, 16.23; HRMS (ESI)  $m/z$  calcd. for  $\text{C}_{17}\text{H}_{21}\text{N}_2\text{O}_3\text{S}$   $[\text{M}+\text{H}]^+$ : 333.1267, found 333.1274.

**3-(benzyloxy)-4-(((1,3-dimethyl-2-oxindolin-3-yl)methyl)sulfonyl)butanenitrile (3v)<sup>1</sup>**

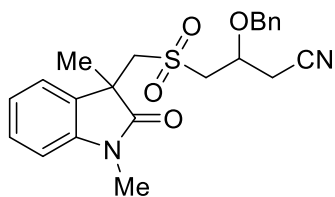

Yellow oil (75.8 mg, 81%, *dr* = 1.6:1); <sup>1</sup>H NMR (400 MHz, CDCl<sub>3</sub>): δ 7.40 – 7.23 (m, 7 H), 7.09 – 7.01 (m, 1 H), 6.82 (d, *J* = 7.8 Hz, 1 H), 4.64 – 4.45 (m, 2 H), 4.15 – 4.09 (m, 1 H), 3.72 – 3.60 (m, 1.5 H), 3.45 (d, *J* = 14.8 Hz, 0.5 H), 3.19 – 3.14 (m, 3.3 H), 3.00 – 2.90 (m, 1 H), 2.67 – 2.55 (m, 2 H), 2.36– 2.32 (m, 0.7 H), 1.24 (s, 1.15 H), 1.15 (s, 1.85 H); <sup>13</sup>C NMR (101 MHz, CDCl<sub>3</sub>): δ 178.04 (2 C), 143.59, 143.31, 136.34, 136.16, 130.30, 129.50, 129.27, 128.89, 128.77, 128.71, 128.59 (2 C), 128.48, 128.37, 128.34, 124.17, 123.60, 122.88, 122.73, 115.88, 108.93 (2 C), 72.99, 72.69, 70.45, 69.77, 61.03, 60.73, 58.71, 57.96, 45.52, 45.45, 26.72, 26.70, 25.15, 24.88, 23.10, 22.64.

**benzyl 3-cyano-2-(((1,3-dimethyl-2-oxindolin-3-yl)methyl)sulfonyl)methyl)propanoate (3w)<sup>1</sup>**

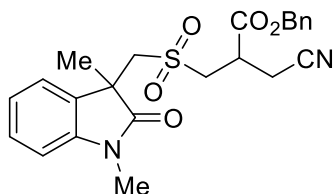

Yellow oil (71.0 mg, 86%, *dr* = 1:1); <sup>1</sup>H NMR (400 MHz, CDCl<sub>3</sub>): δ 7.38 – 7.31 (m, 7 H), 7.08 (q, *J* = 7.2 Hz, 1 H), 6.90 (t, *J* = 8.2 Hz, 1 H), 5.23 – 5.12 (m, 2 H), 3.77 (d, *J* = 14.6 Hz, 1 H), 3.67 – 3.61 (m, 1 H), 3.45 – 3.40 (m, 0.5 H), 3.28 – 3.21 (m, 5 H), 2.87 – 2.78 (m, 2.5 H), 1.43 (s, 1.5 H), 1.43 (s, 1.5 H); <sup>13</sup>C NMR (101 MHz, CDCl<sub>3</sub>): δ 177.78, 177.73, 169.34 (2 C), 143.41, 143.30, 134.61, 134.58, 129.41, 129.26, 128.91(2 C), 128.82 (2 C), 128.81, 128.69, 125.54, 125.50, 123.55, 122.88, 116.61, 116.42, 109.15, 109.06, 68.45, 68.40, 60.62, 60.42, 54.00 (2 C), 45.58, 45.53, 35.74, 35.71, 26.74 (2 C), 25.10, 25.01, 19.36, 19.34.

**2-(((1,3-dimethyl-2-oxindolin-3-yl)methyl)sulfonyl)methoxy)acetonitrile (3x)<sup>1</sup>**

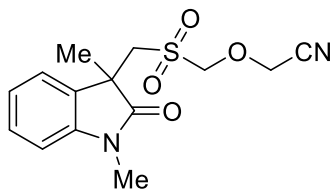

Yellow oil (52.4 mg, 85%); <sup>1</sup>H NMR (400 MHz, CDCl<sub>3</sub>): δ 7.22 (td, *J* = 7.8 Hz, 1.2 Hz, 1 H), 7.13 – 7.08 (m, 1 H), 7.00 (t, *J* = 7.6 Hz, 1 H), 6.80 (d, *J* = 7.8 Hz, 1 H), 3.94 – 3.85 (d, *J* = 3.8 Hz, 2 H), 3.31 – 3.25 (m, 1 H), 3.20 – 3.15 (m, 1 H), 3.14 (s, 3 H), 3.35 – 3.25 (m, 1 H), 1.96 – 1.90 (m, 1 H), 1.30 (s, 3 H); <sup>13</sup>C NMR (101 MHz, CDCl<sub>3</sub>): δ 180.21, 143.22, 132.58, 128.14, 122.58, 122.53, 115.73, 108.30, 68.07, 55.82, 46.31, 36.72, 26.24, 24.40.

*ethyl 4-(((1,3-dimethyl-2-oxo-2,3-dihydro-1H-benzo[f]indol-3-yl)methyl)sulfonyl)butanoate*

(6)

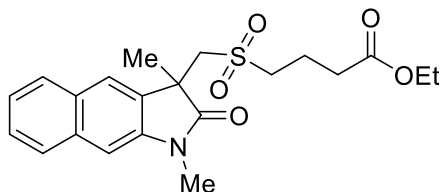

Yellow oil (61.3 mg, 76%);  $^1\text{H}$  NMR (500 MHz,  $\text{CDCl}_3$ ):  $\delta$  7.99 (dd,  $J = 15.4, 8.7$  Hz, 2 H), 7.88 (d,  $J = 8.5$  Hz, 1 H), 7.64 (t,  $J = 7.3$  Hz, 1 H), 7.47 (t,  $J = 7.6$  Hz, 1 H), 7.35 (d,  $J = 8.4$  Hz, 1 H), 4.21 – 4.10 (m, 3 H), 3.99 (d,  $J = 14.7$  Hz, 1 H), 3.46 (s, 3 H), 2.53 – 2.40 (m, 2 H), 2.21 – 2.14 (m, 1 H), 2.10 – 2.04 (m, 1 H), 1.97 – 1.85 (m, 2 H), 1.74 (s, 3 H), 1.29 (t,  $J = 7.2$  Hz, 3 H);  $^{13}\text{C}$  NMR (126 MHz,  $\text{CDCl}_3$ ):  $\delta$  179.20, 171.94, 141.74, 130.64, 130.37, 130.23, 129.51, 128.33, 127.83, 123.84, 121.24, 110.26, 60.69, 58.97, 53.37, 46.50, 32.11, 27.02, 24.50, 17.49, 14.25; HRMS (ESI)  $m/z$  calcd. for  $\text{C}_{21}\text{H}_{26}\text{NO}_5\text{S}$   $[\text{M}+\text{H}]^+$ : 404.1526, found 404.1529.



#### 4. References

1. Z. Chen; Q. Zhou; Q.-L. Wang; P. Chen; B.-Q. Xiong; Y. Liang; K.-W. Tang; Y. Liu., *Adv. Synth. Catal.* 2020, **362**, 3004 – 3010.

## 5. $^1\text{H}$ , $^{13}\text{C}$ and $^{19}\text{F}$ NMR spectra of products

### 4-(((1,3-dimethyl-2-oxindolin-3-yl)methyl)sulfonyl)butanenitrile (3a)

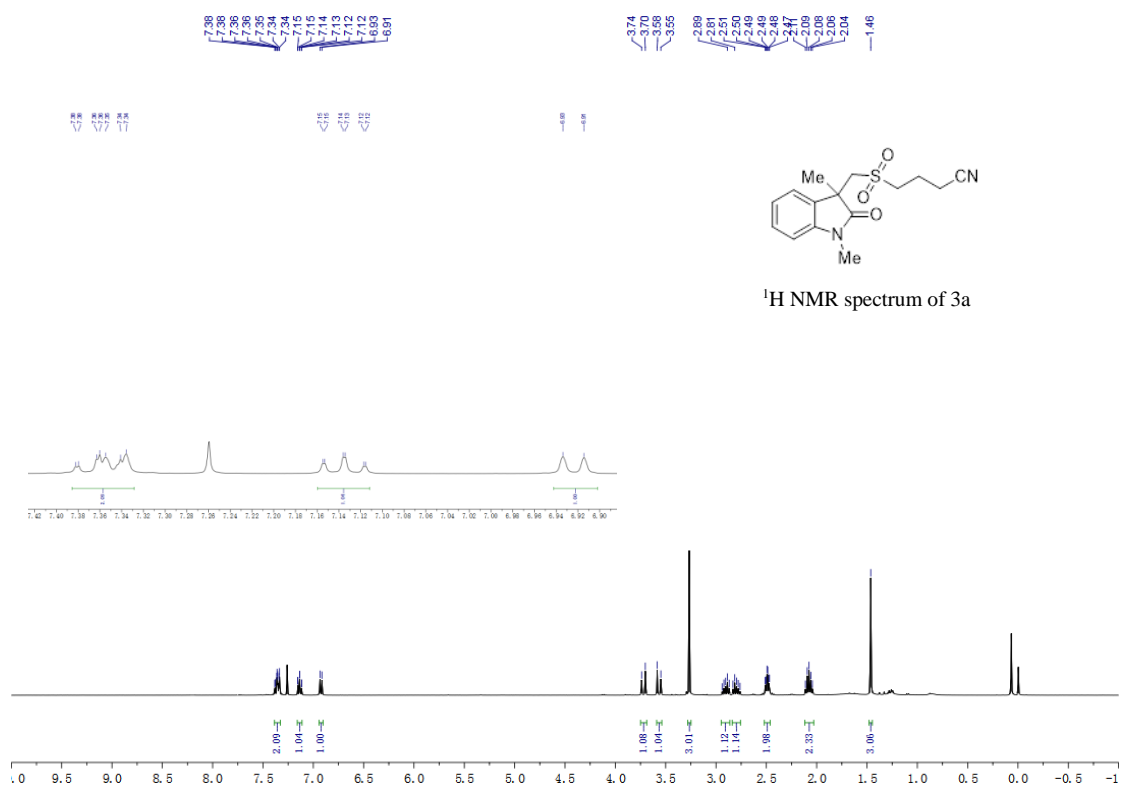

$^1\text{H}$  NMR spectrum of 3a

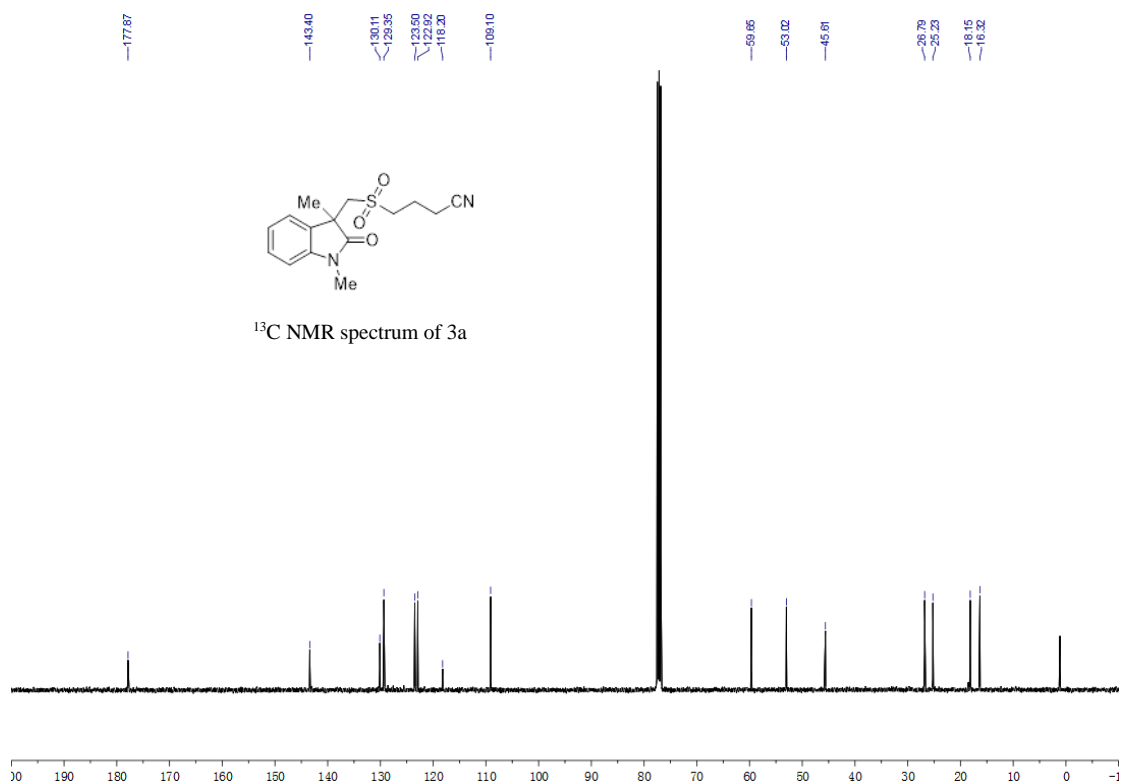

$^{13}\text{C}$  NMR spectrum of 3a

4-(((1,3-dimethyl-2-oxo-5-phenylindolin-3-yl)methyl)sulfonyl)butanenitrile (**3b**)

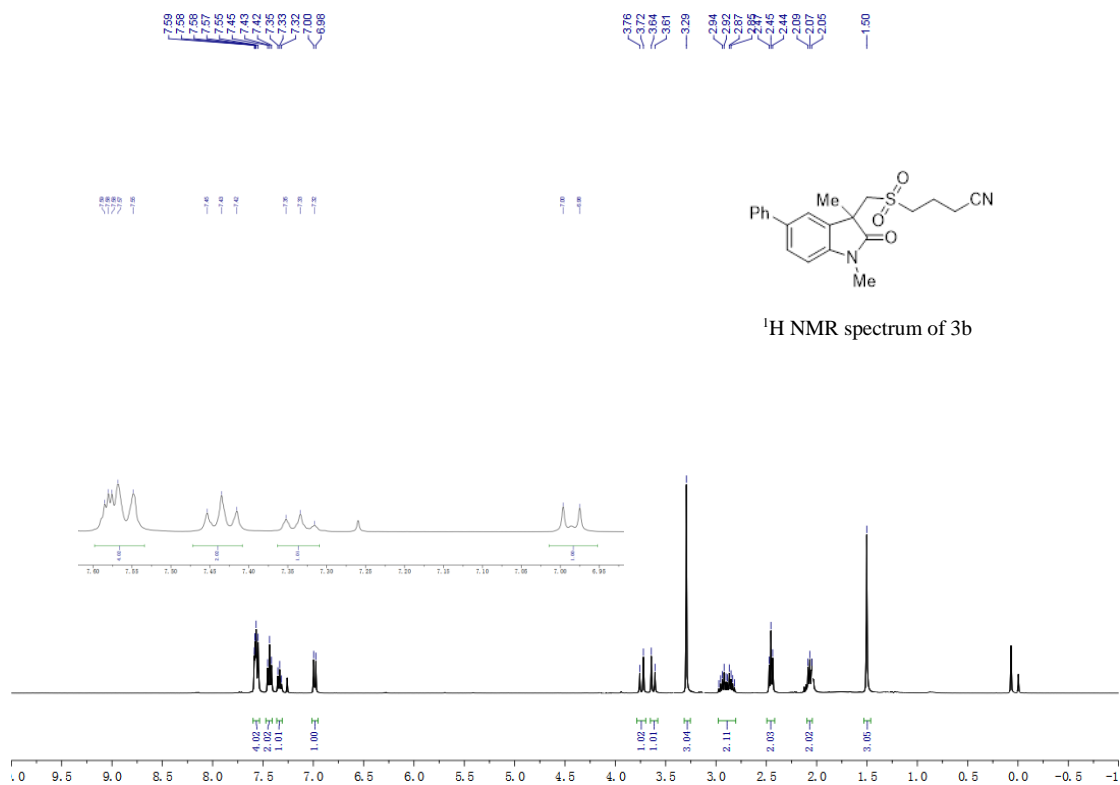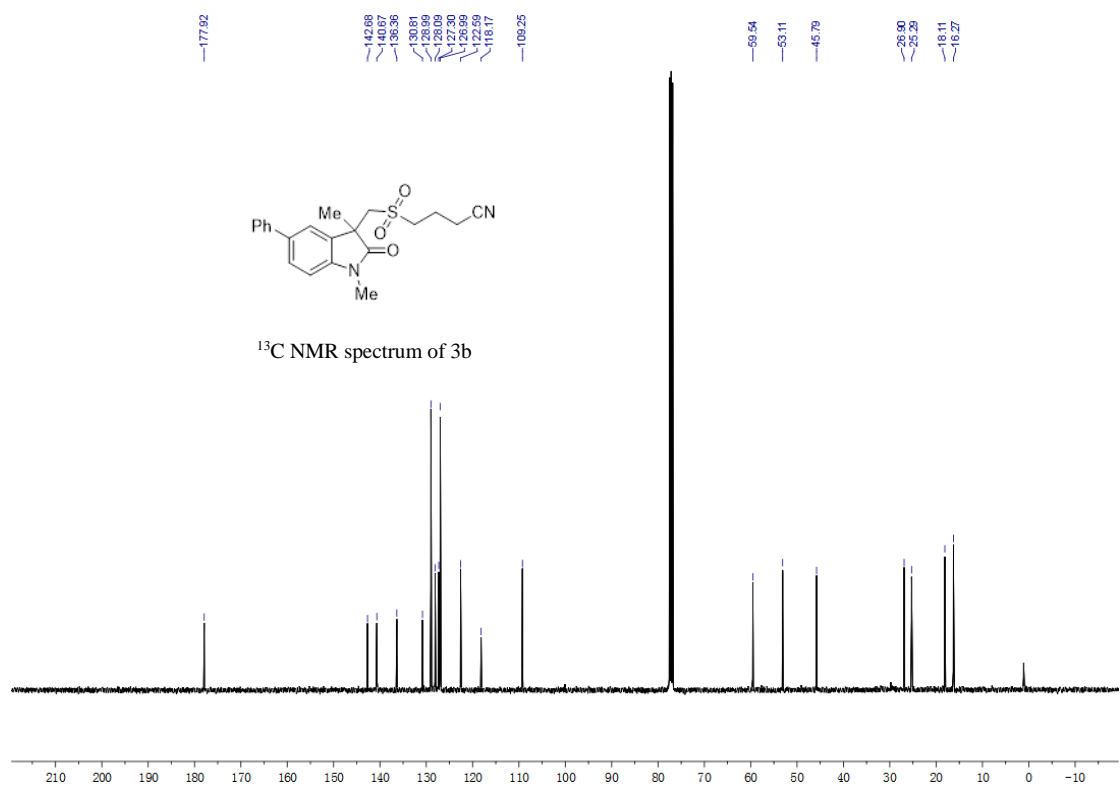

4-(((1,3,5-trimethyl-2-oxindolin-3-yl)methyl)sulfonyl)butanenitrile (3c)

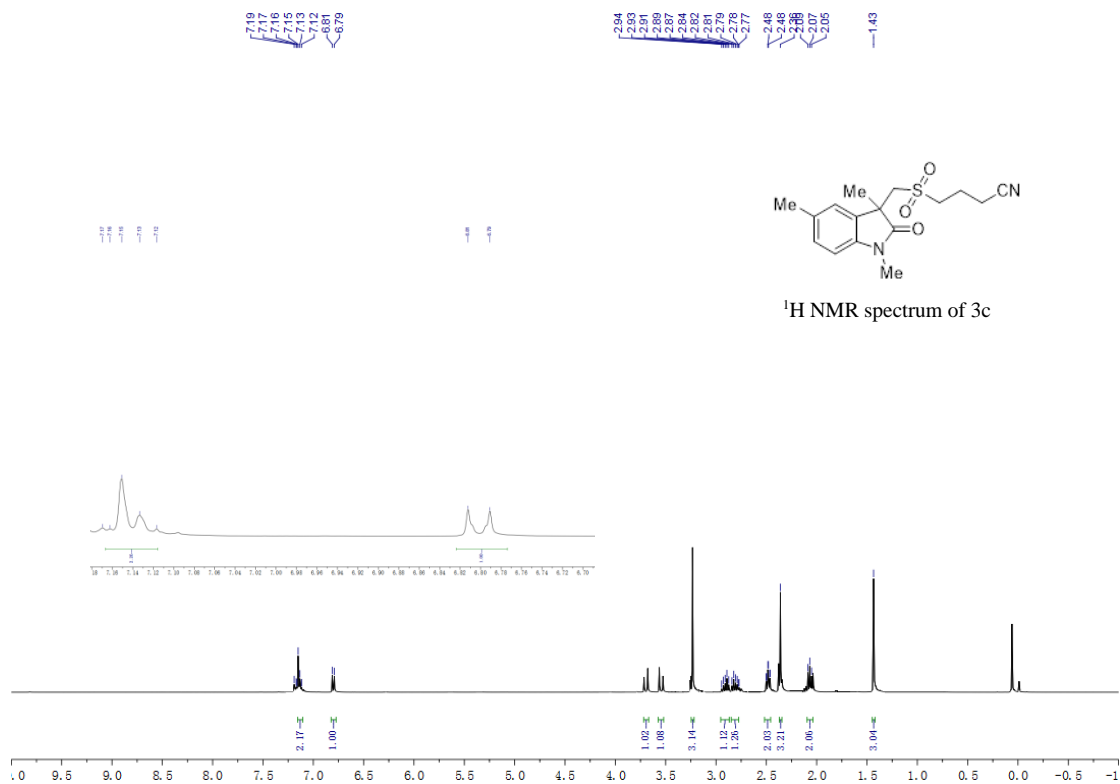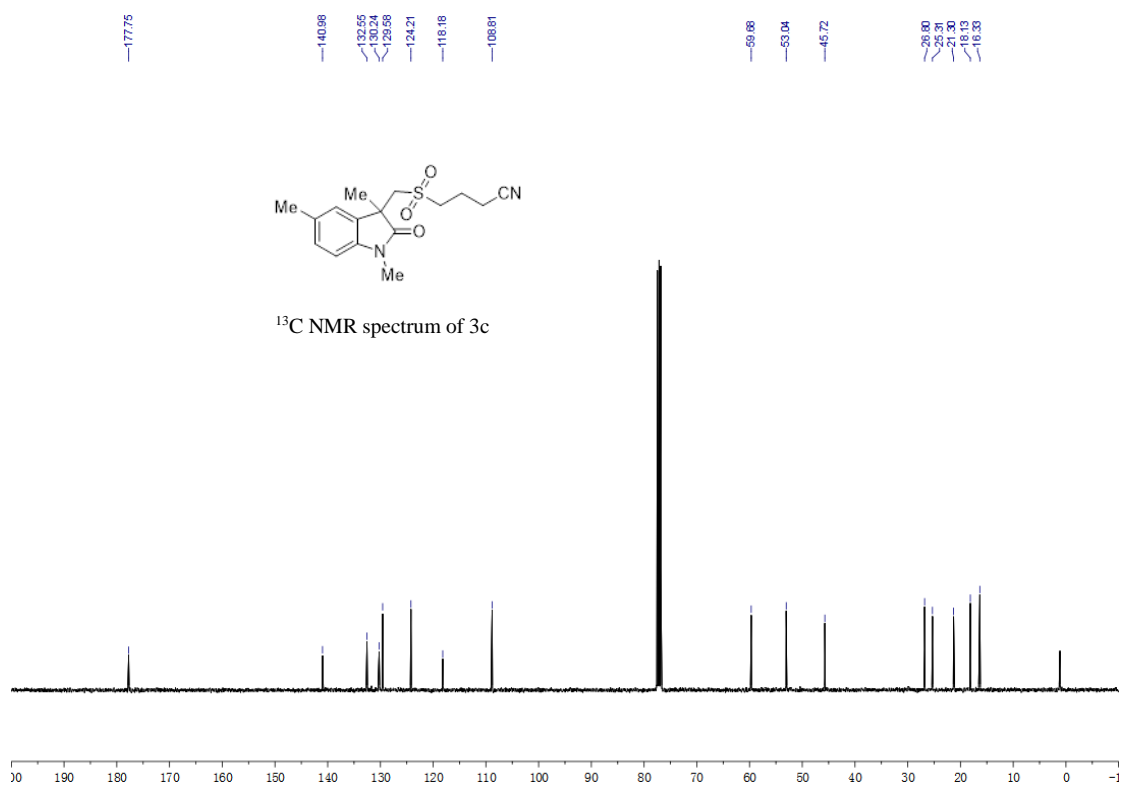

4-(((5-(*tert*-butyl)-1,3-dimethyl-2-oxindolin-3-yl)methyl)sulfonyl)butanenitrile (**3d**)

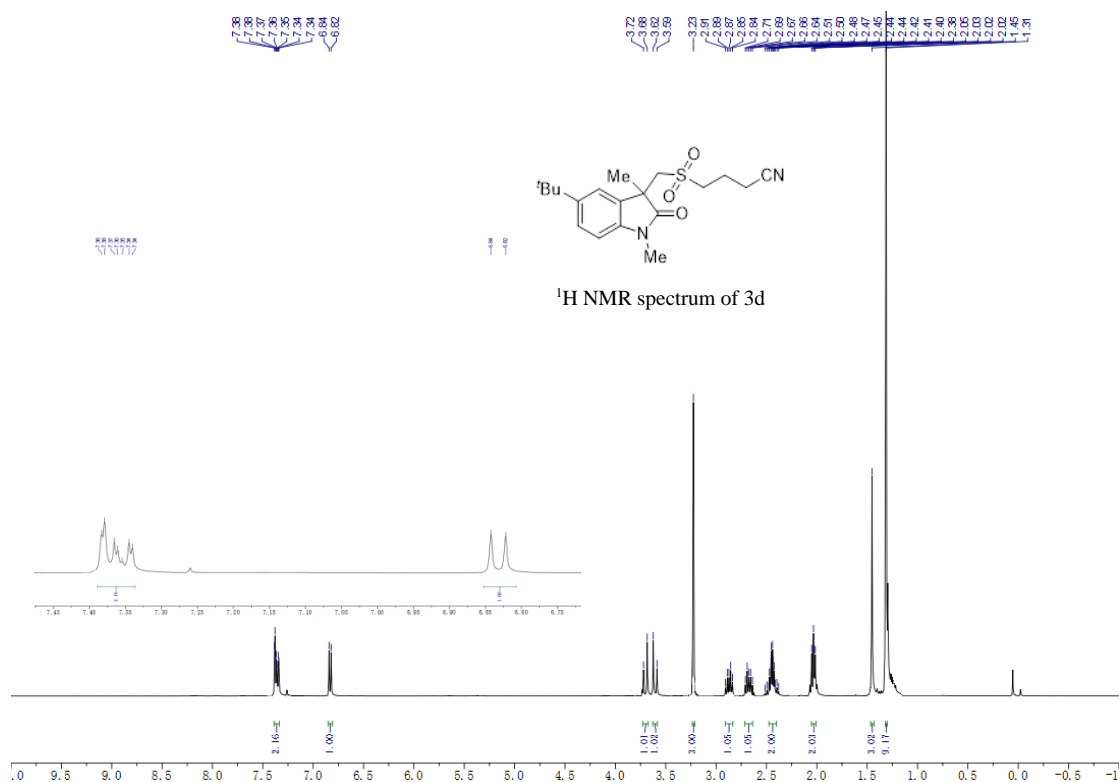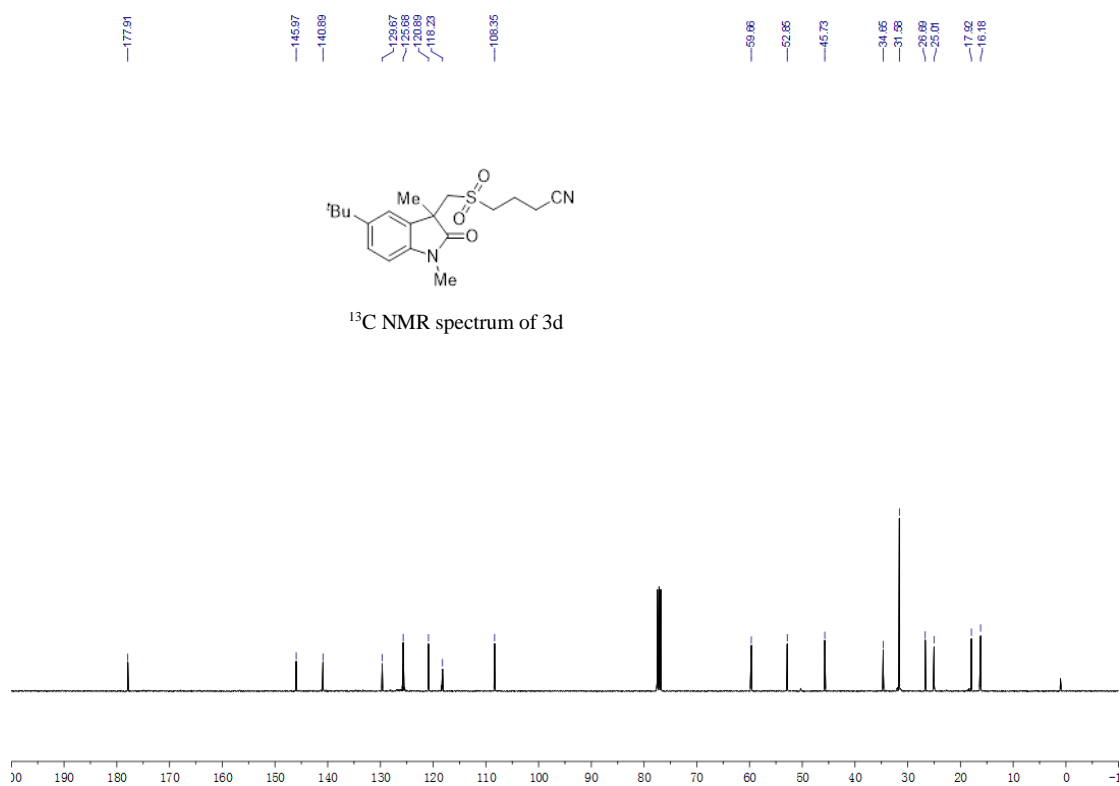

**4-(((1,3-dimethyl-2-oxo-5-phenoxyindolin-3-yl)methyl)sulfonyl)butanenitrile (3e)**

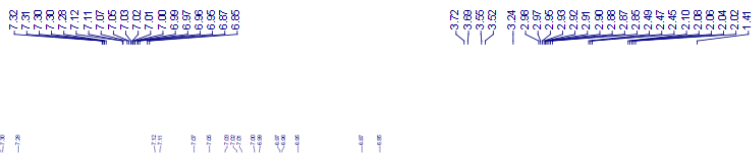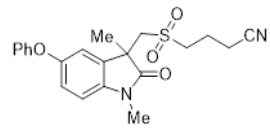

<sup>1</sup>H NMR spectrum of 3e

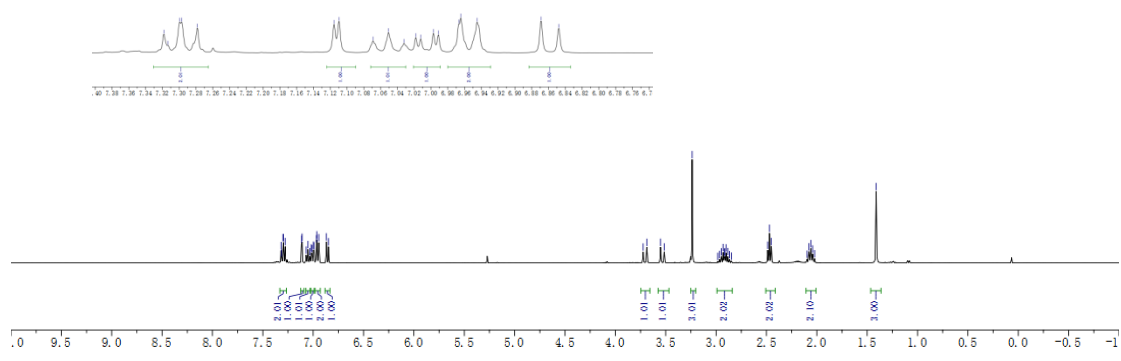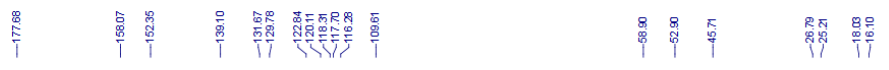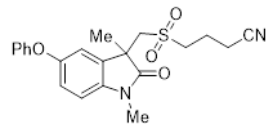

<sup>13</sup>C NMR spectrum of 3e

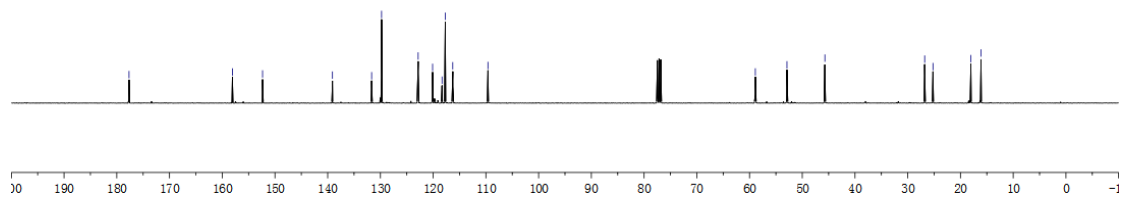

4-(((5-methoxy-1,3-dimethyl-2-oxindolin-3-yl)methyl)sulfonyl)butanenitrile (3f)

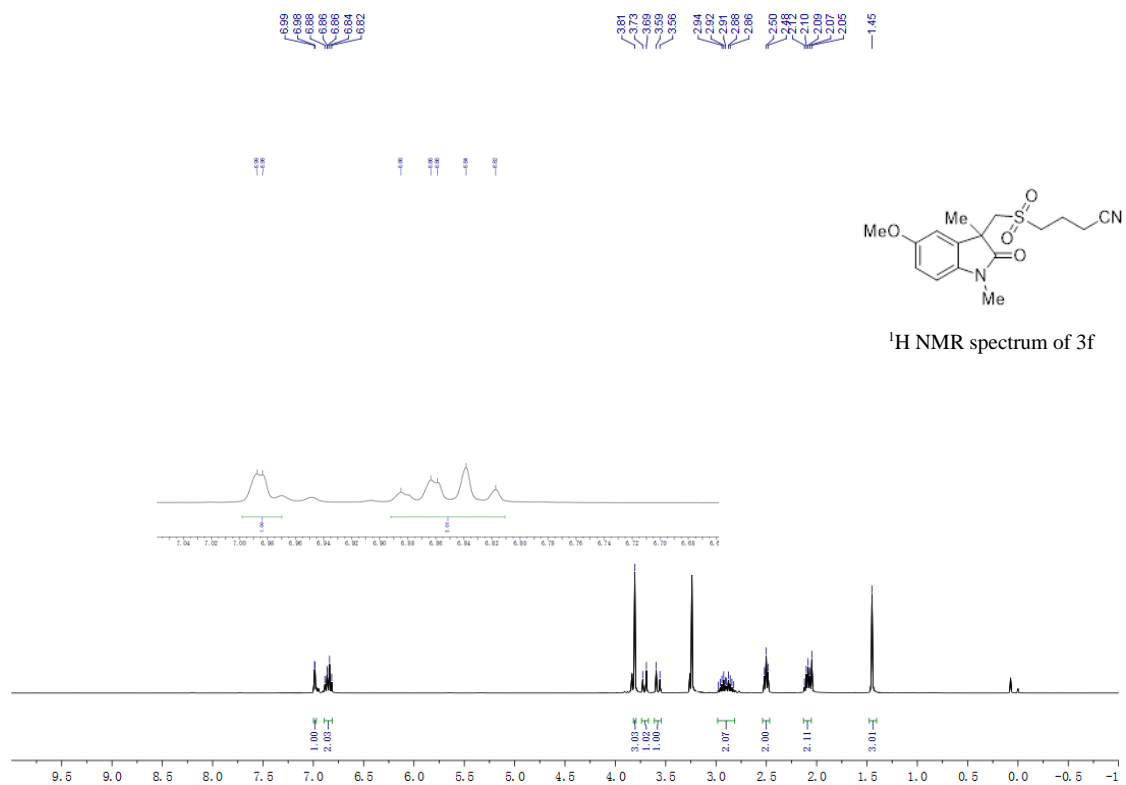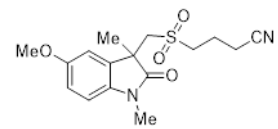

<sup>1</sup>H NMR spectrum of 3f

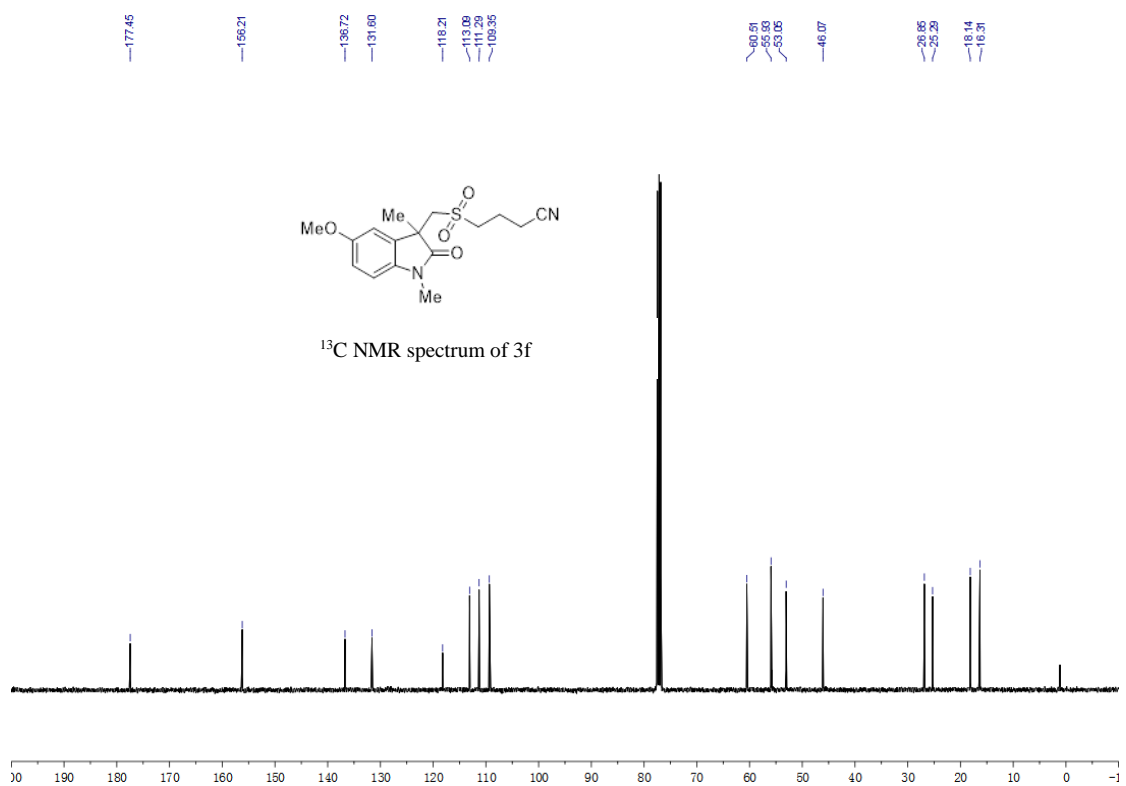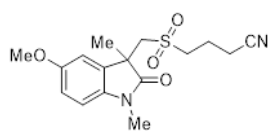

<sup>13</sup>C NMR spectrum of 3f

4-(((1,3-dimethyl-2-oxo-5-(trifluoromethoxy)indolin-3-yl)methyl)sulfonyl)butanenitrile (3g)

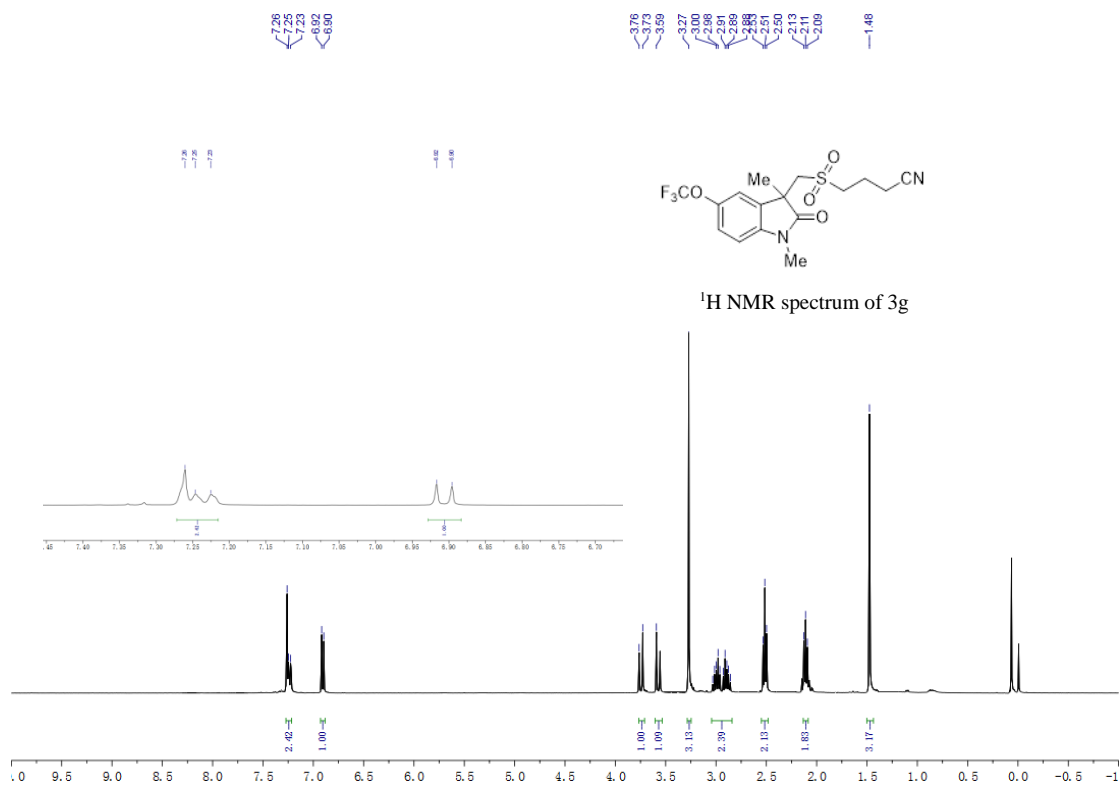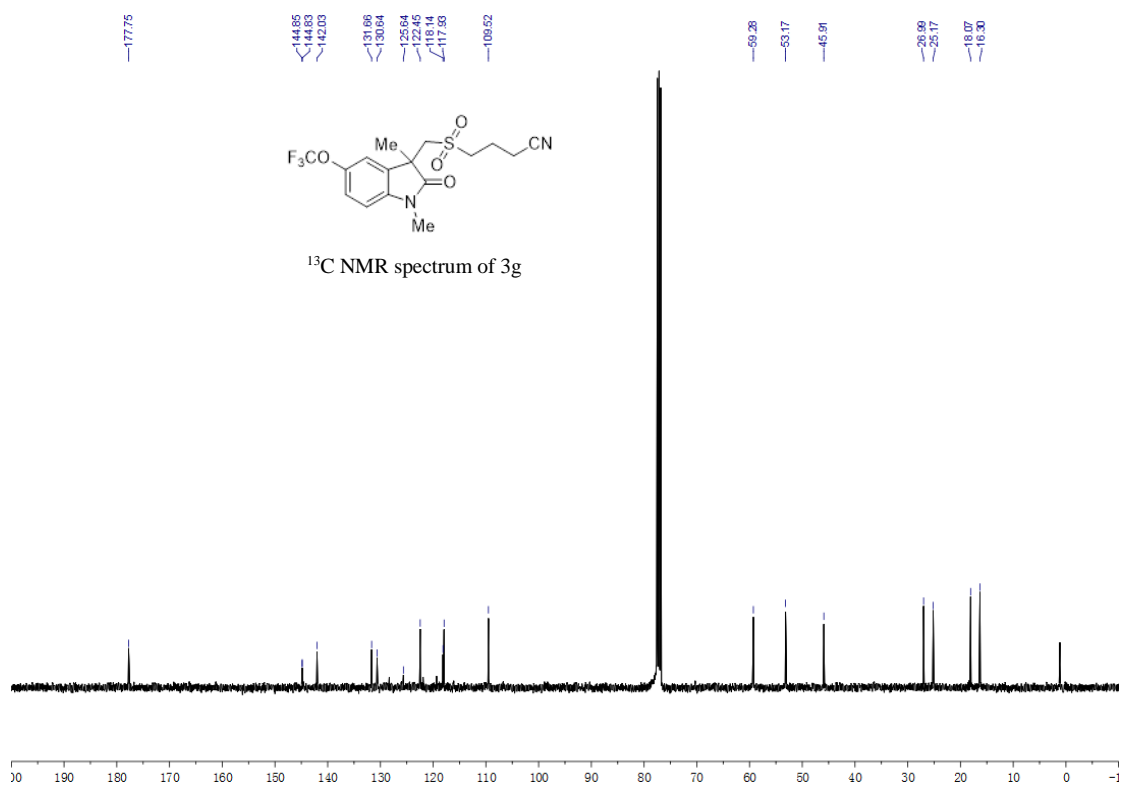



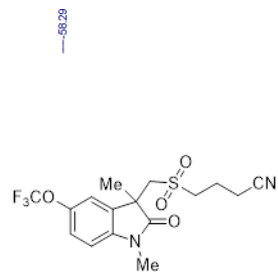

<sup>19</sup>F NMR spectrum of 3g

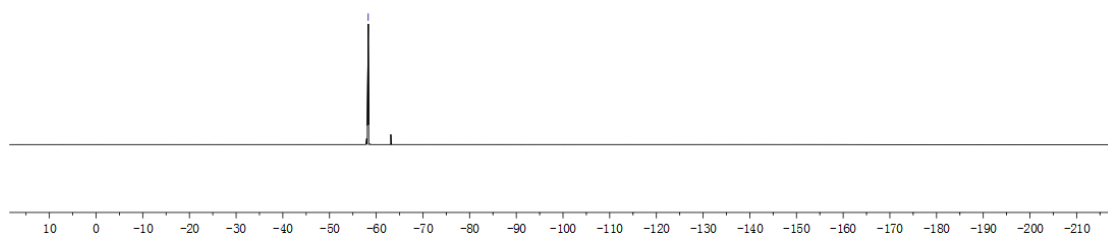

4-(((5-fluoro-1,3-dimethyl-2-oxindolin-3-yl)methyl)sulfonyl)butanenitrile (3h)

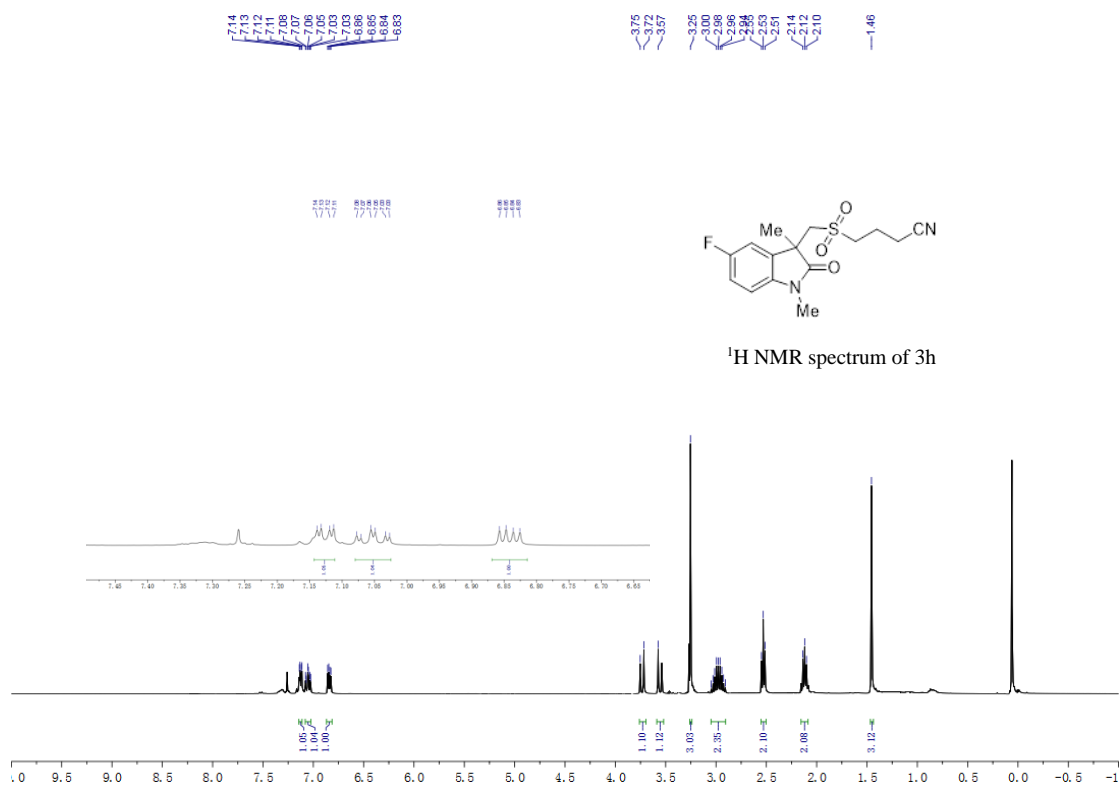

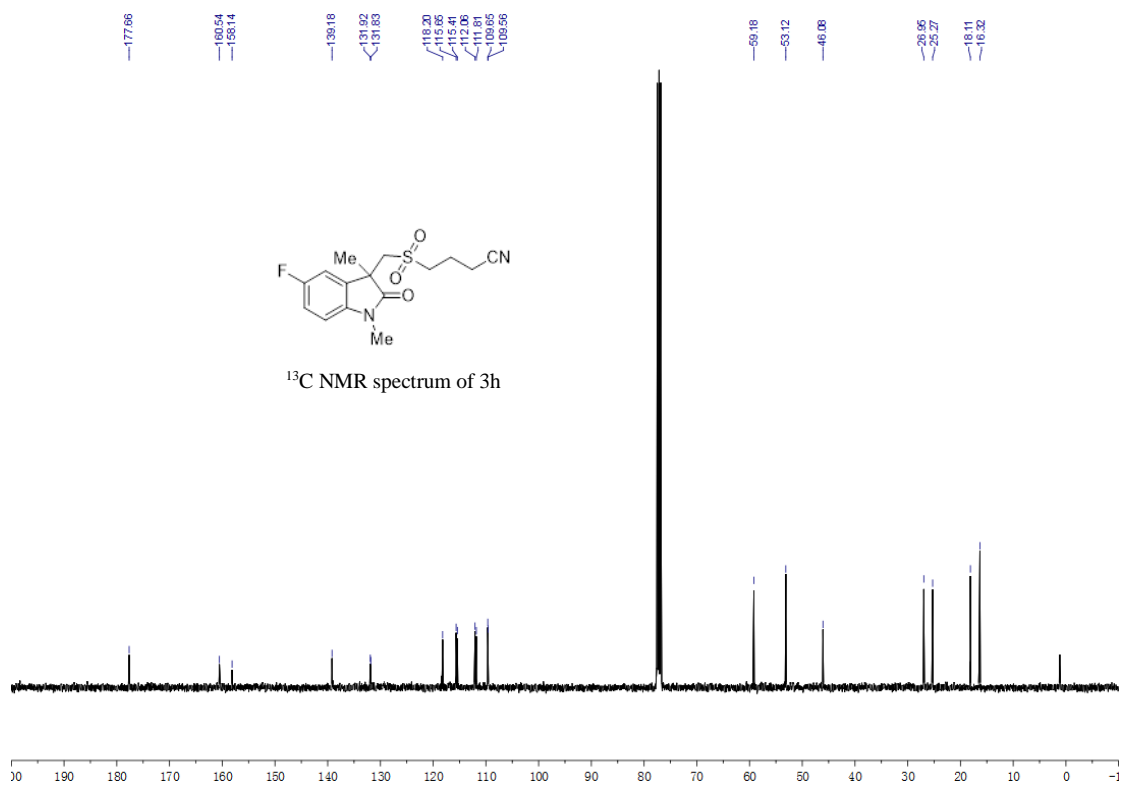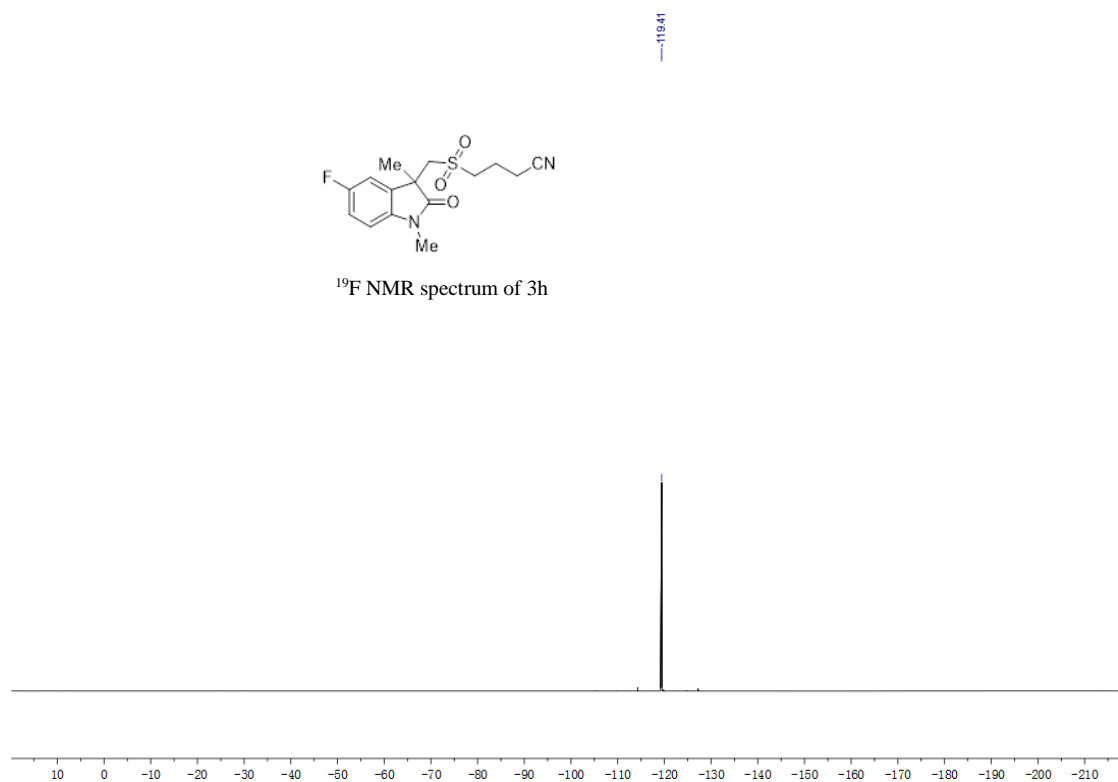

4-(((5-chloro-1,3-dimethyl-2-oxindolin-3-yl)methyl)sulfonyl)butanenitrile (3i)

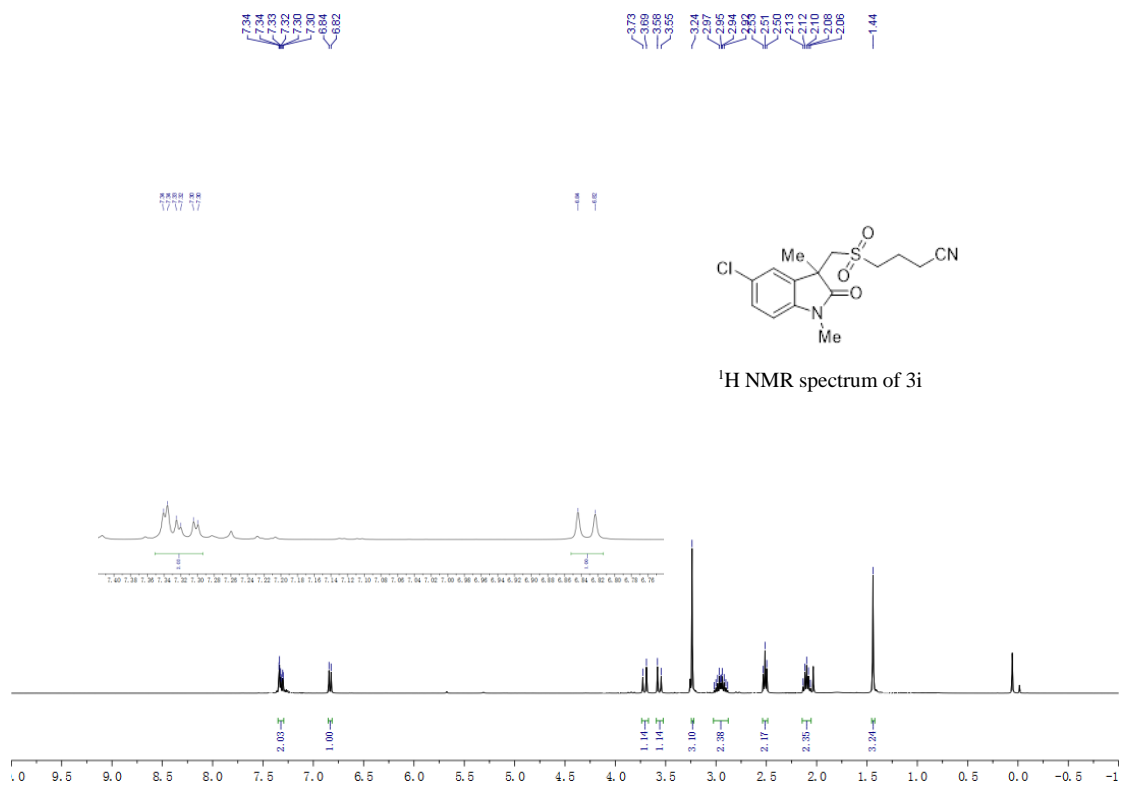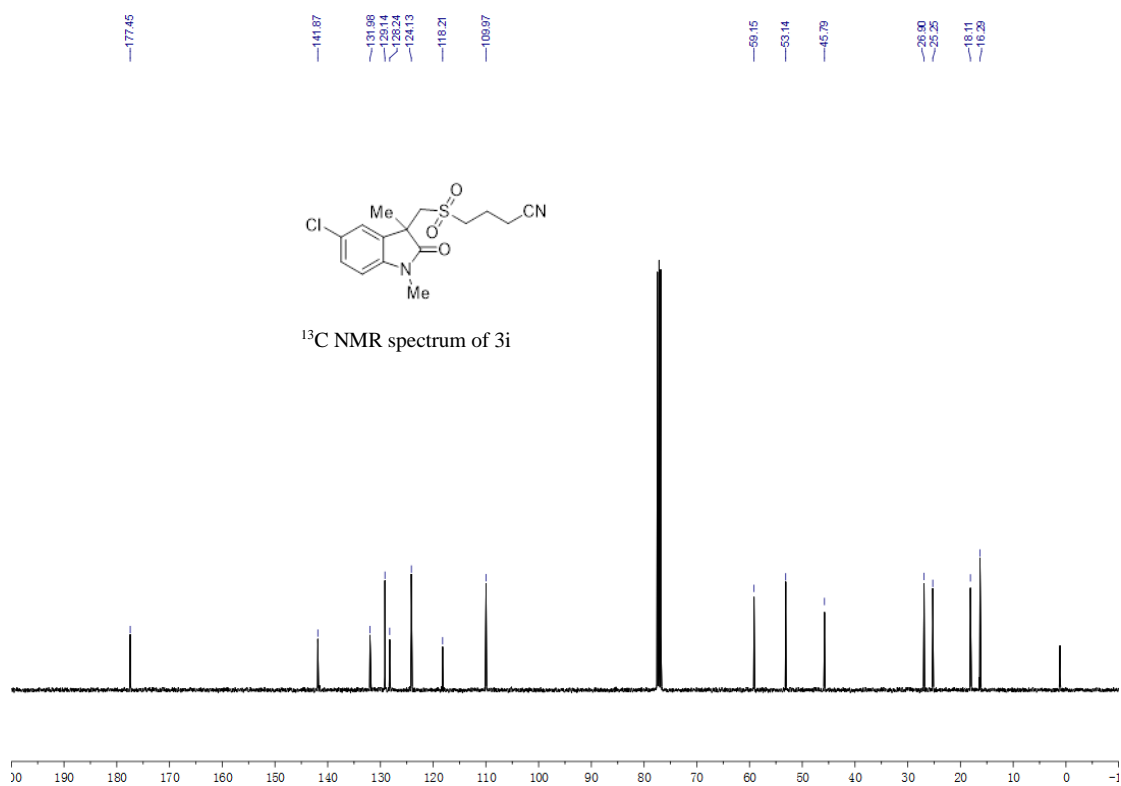

4-(((5-bromo-1,3-dimethyl-2-oxindolin-3-yl)methyl)sulfonyl)butanenitrile (3j)

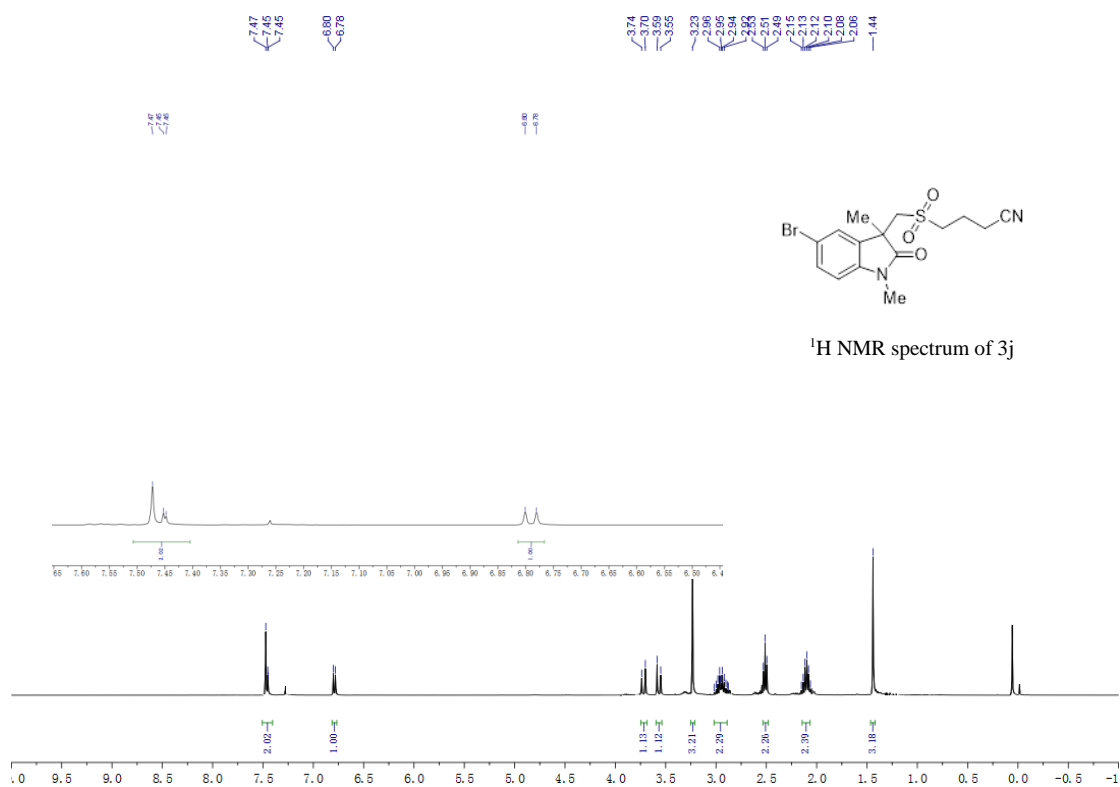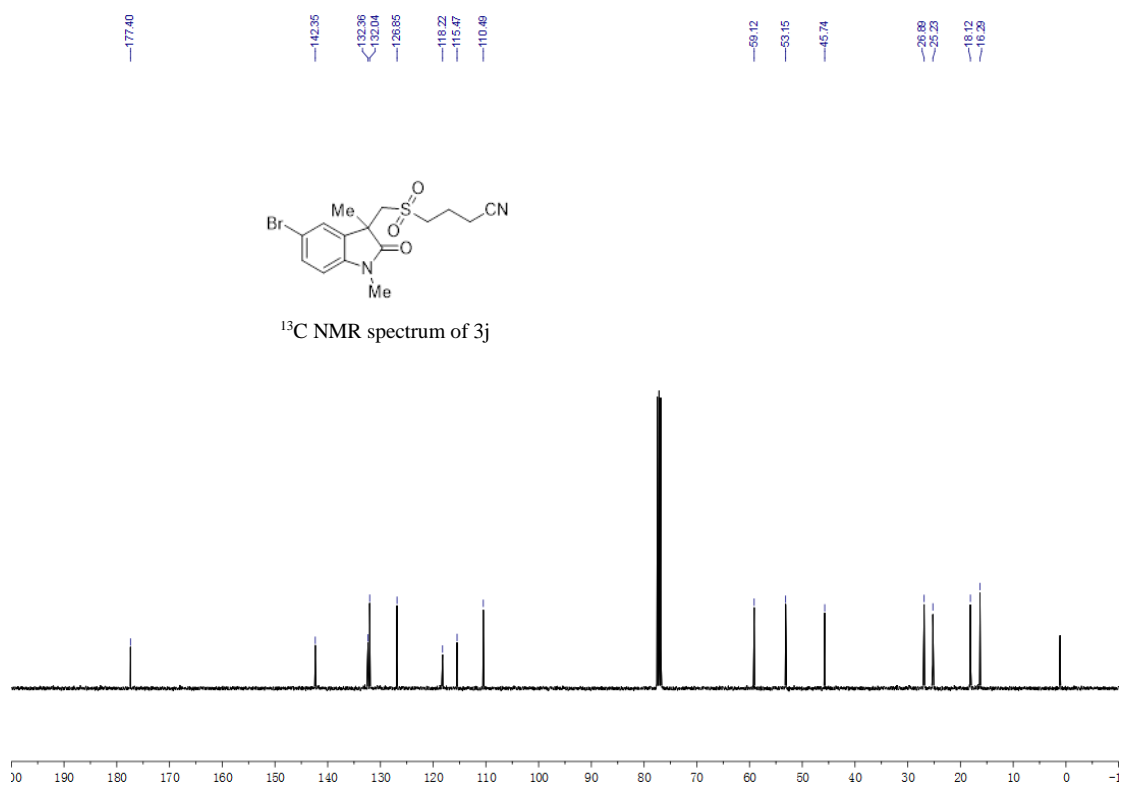

4-(((5-iodo-1,3-dimethyl-2-oxindolin-3-yl)methyl)sulfonyl)butanenitrile (3k)

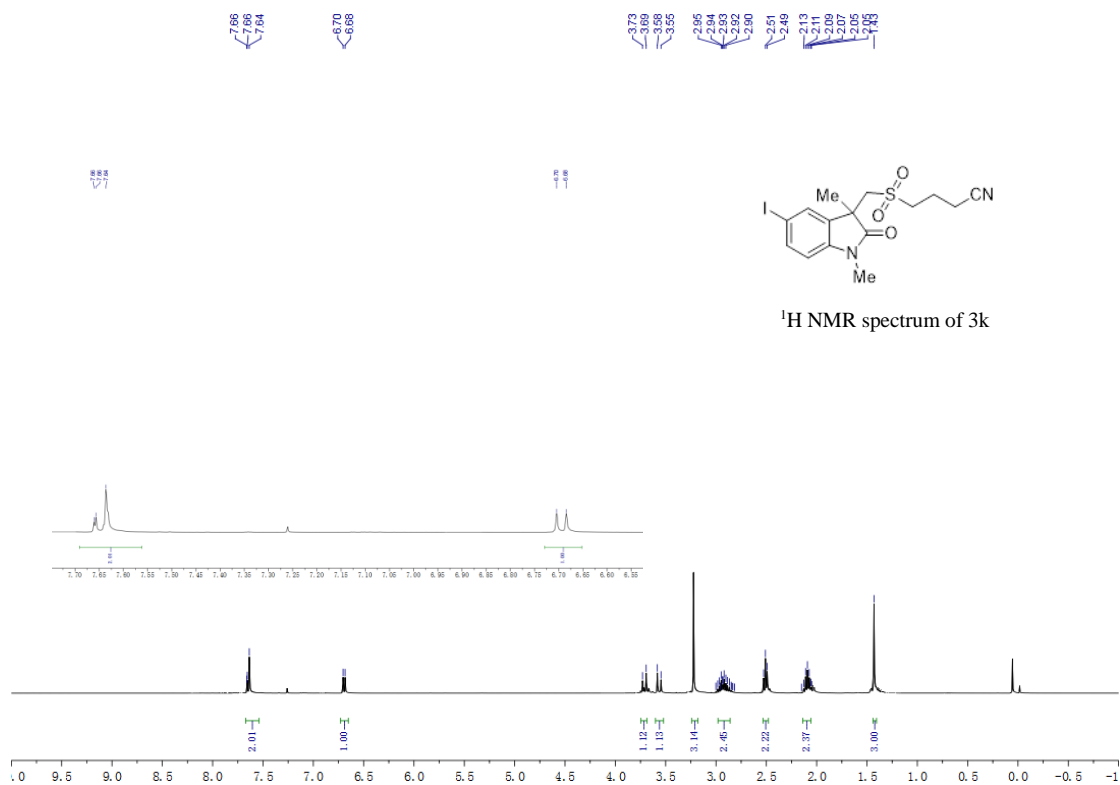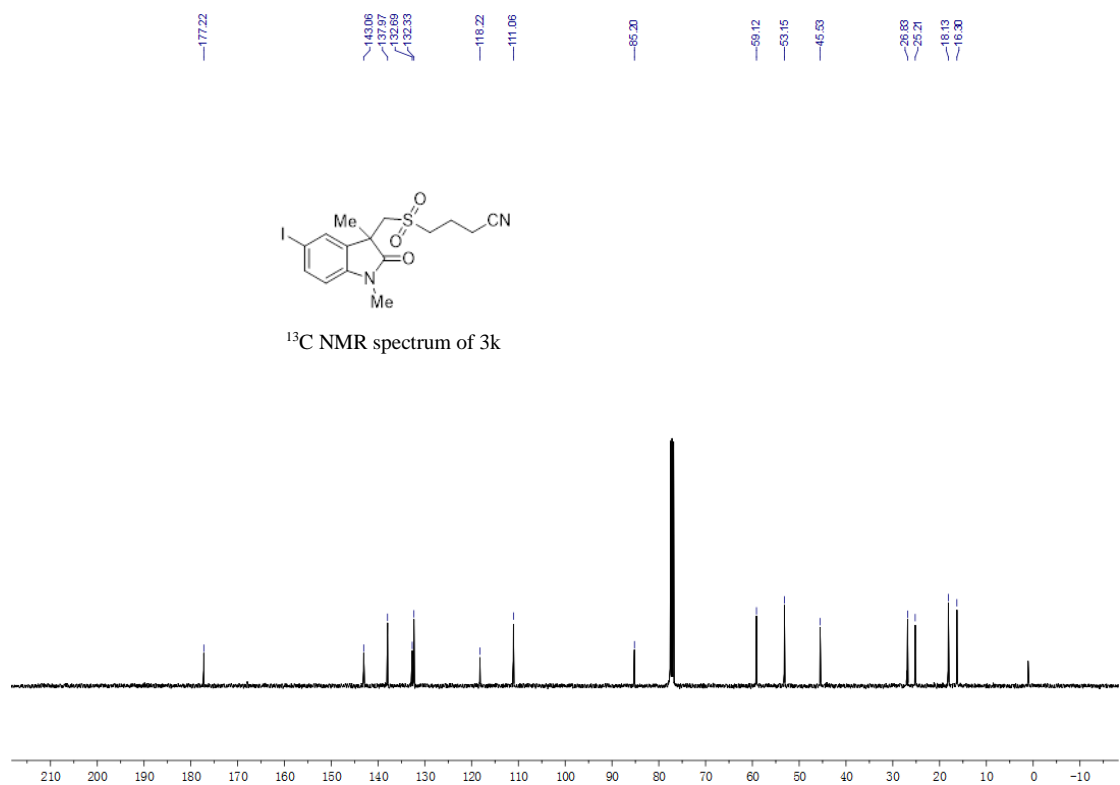

4-(((1,3-dimethyl-2-oxo-5-(trifluoromethyl)indolin-3-yl)methyl)sulfonyl)butanenitrile (31)

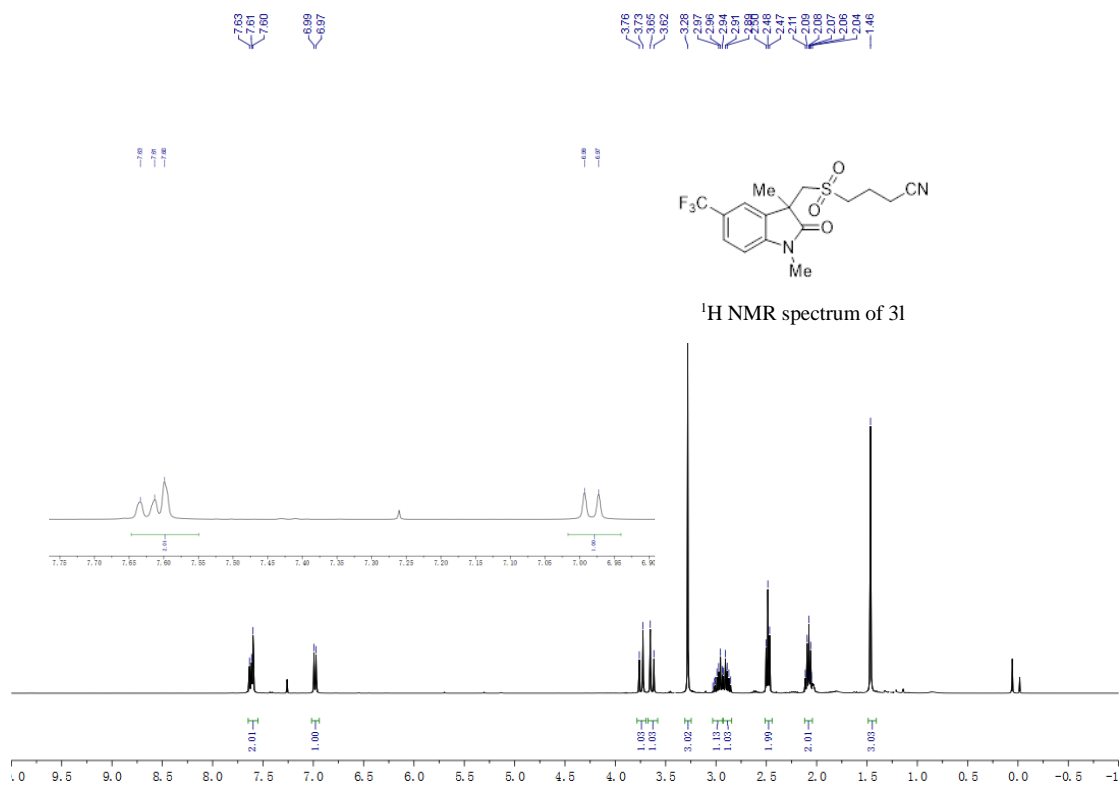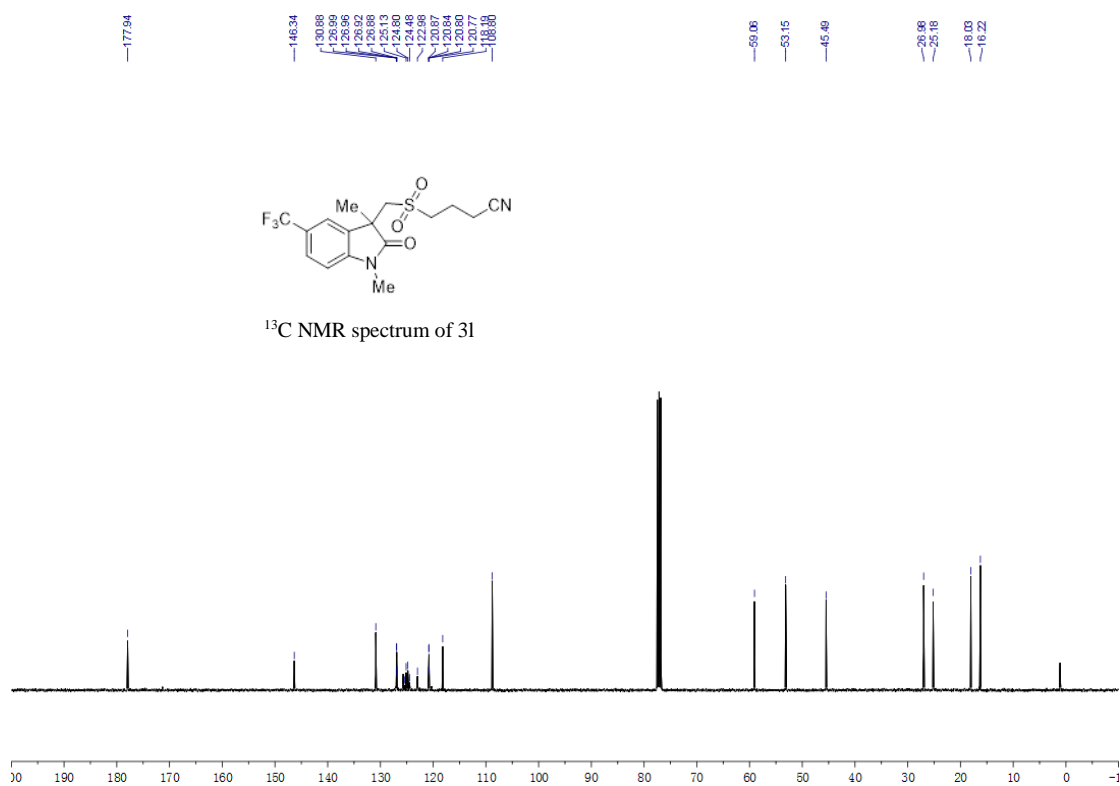

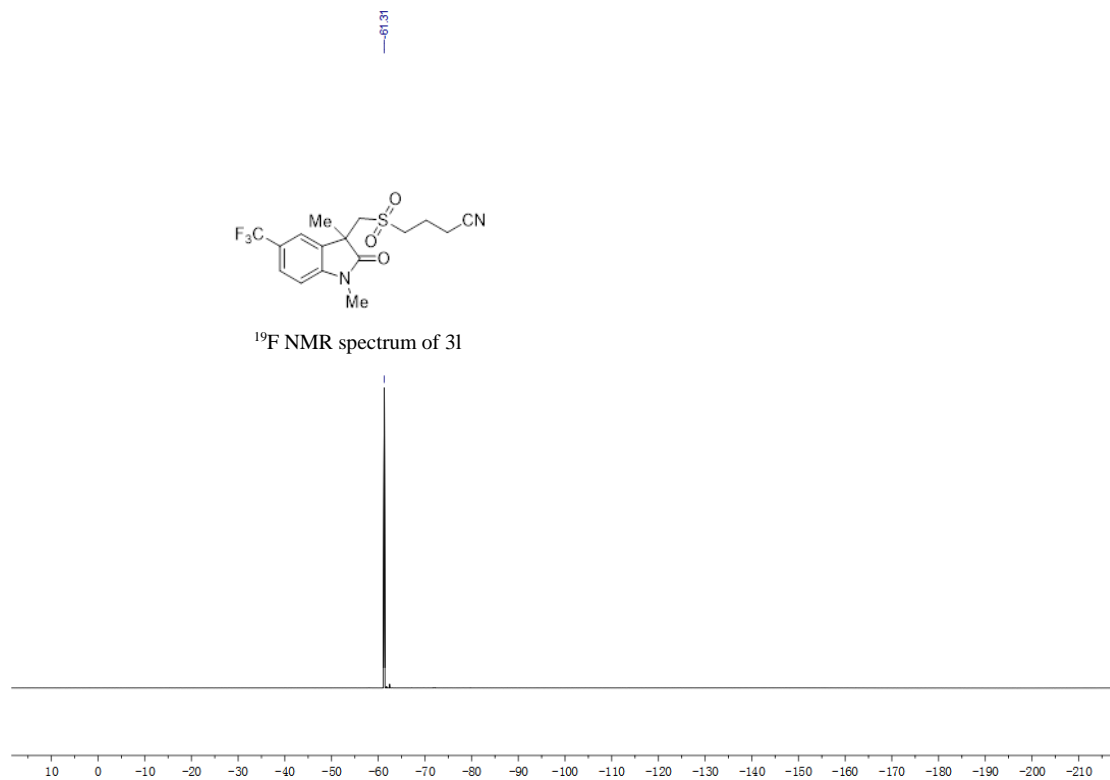

*methyl 3-(((3-cyanopropyl)sulfonyl)methyl)-1,3-dimethyl-2-oxindoline-5-carboxylate (3m)*

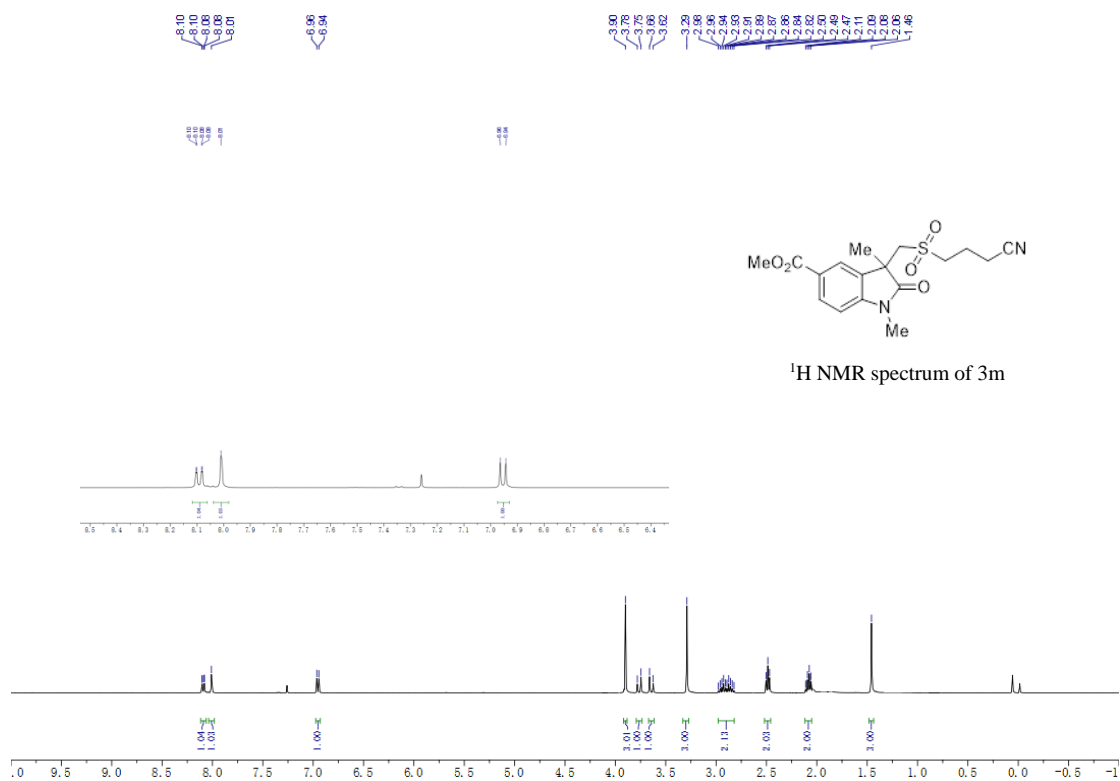

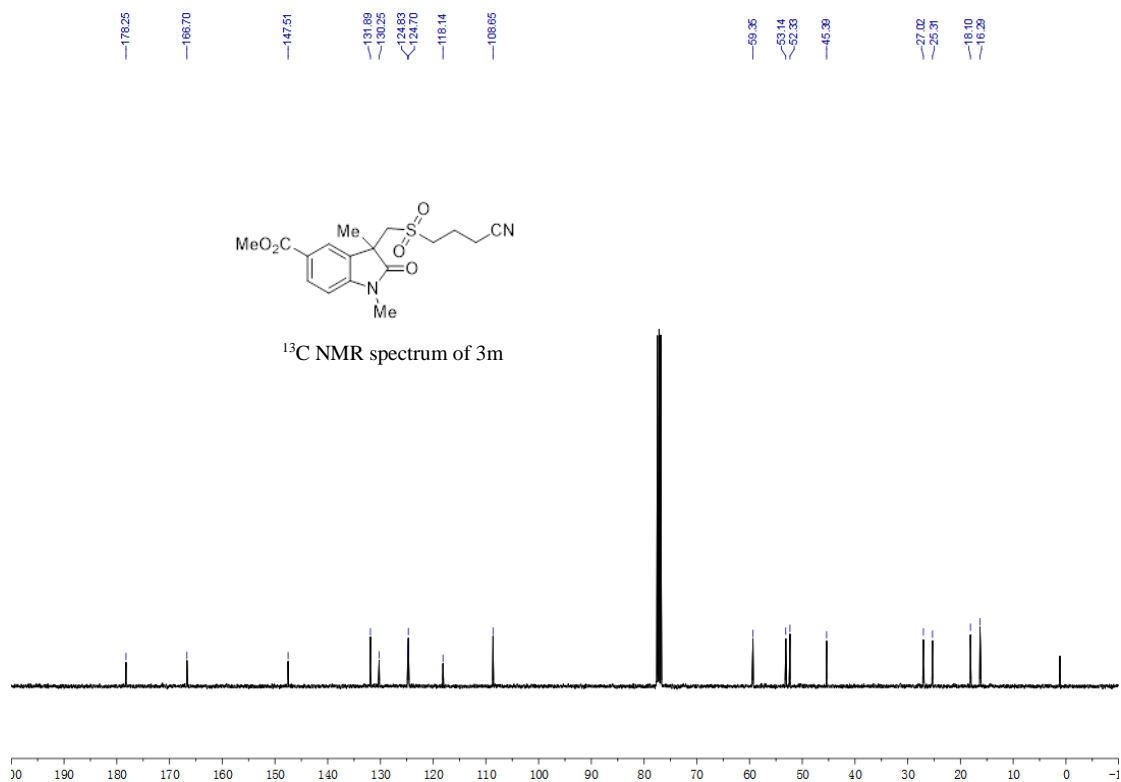

**3-(((3-cyanopropyl)sulfonyl)methyl)-1,3-dimethyl-2-oxindoline-5-carbonitrile (3n)**

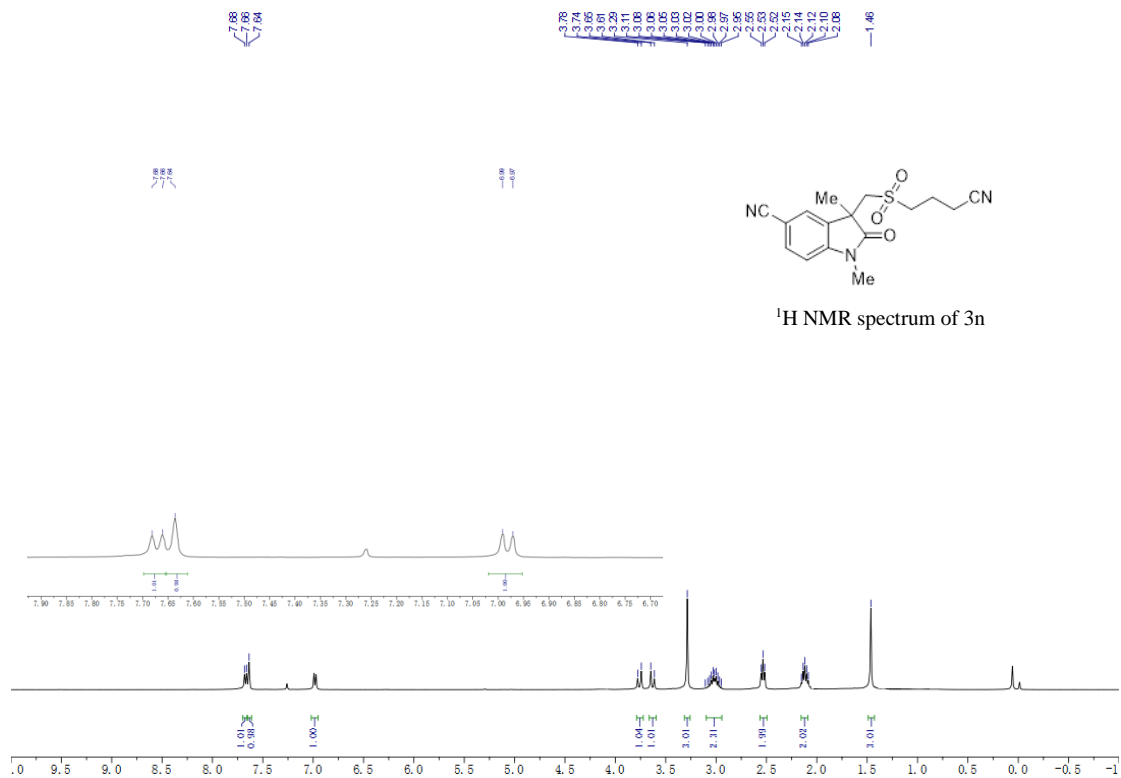



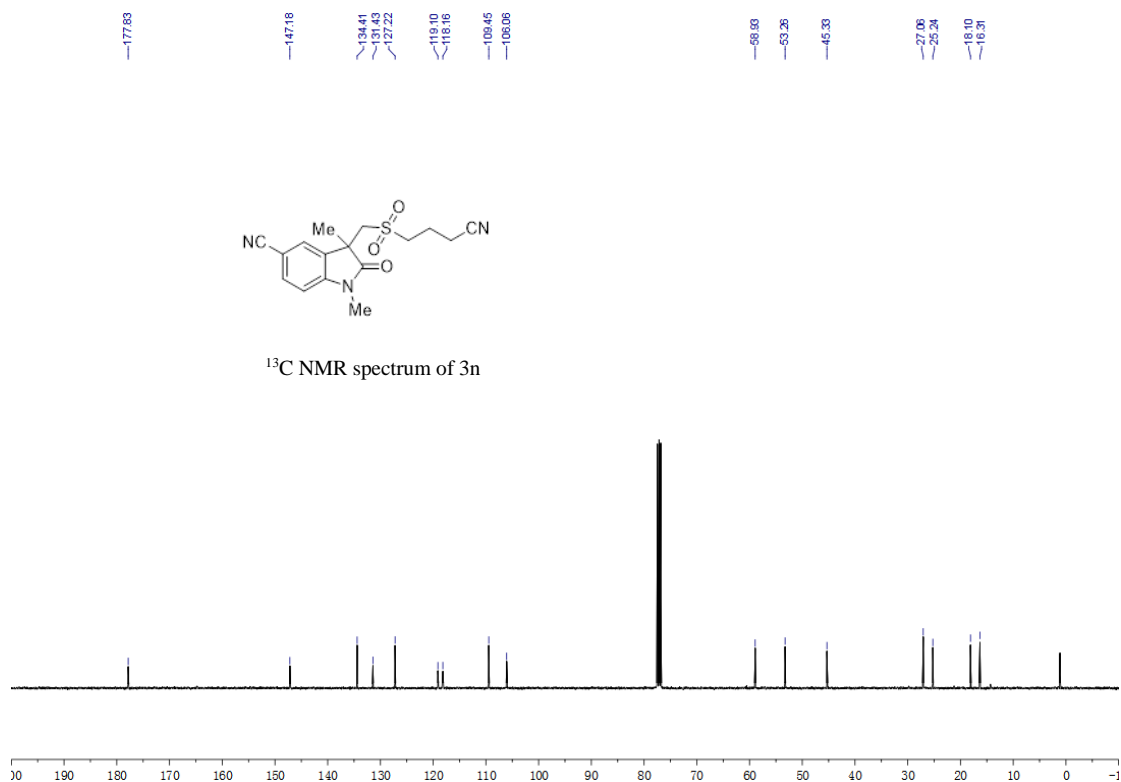

4-(((1,3-dimethyl-2-oxo-2,3-dihydro-1H-benzof[*f*]indol-3-yl)methyl)sulfonyl)butanenitrile (3o)

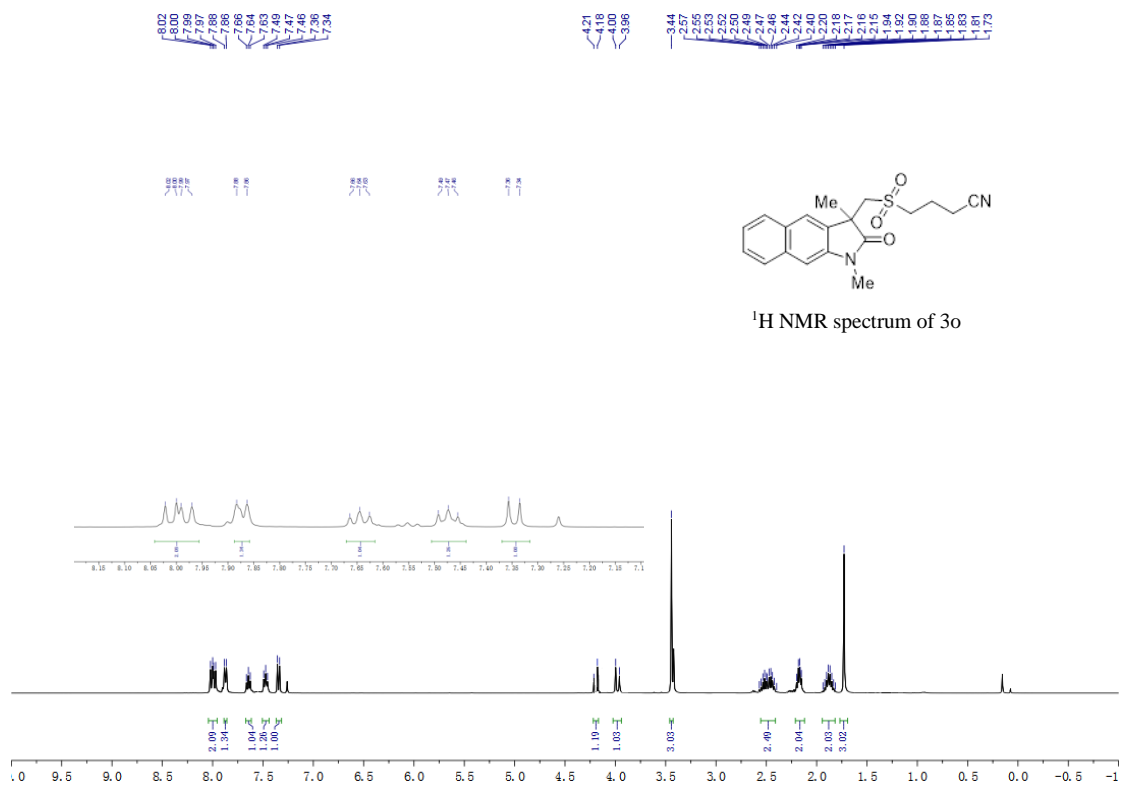

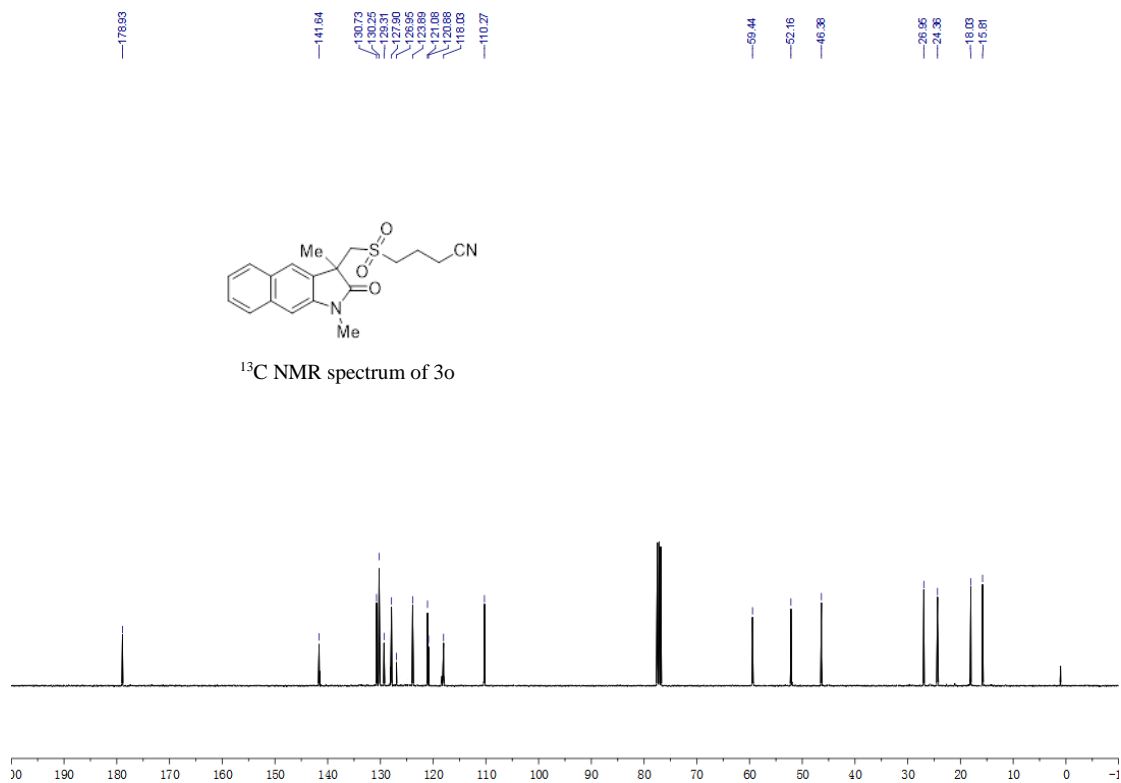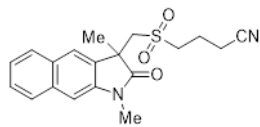

<sup>13</sup>C NMR spectrum of 3o

4-(((1-benzyl-3-methyl-2-oxoindolin-3-yl)methyl)sulfonyl)butanenitrile (3p)

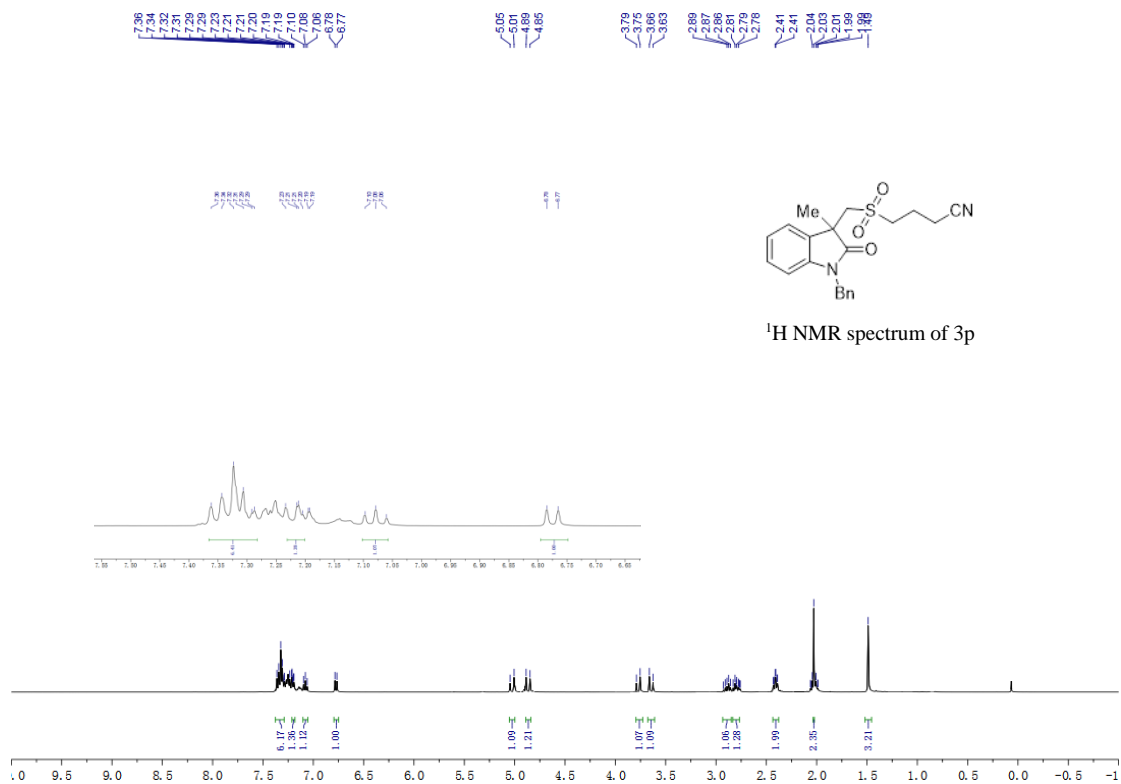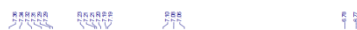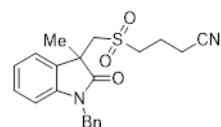

<sup>1</sup>H NMR spectrum of 3p

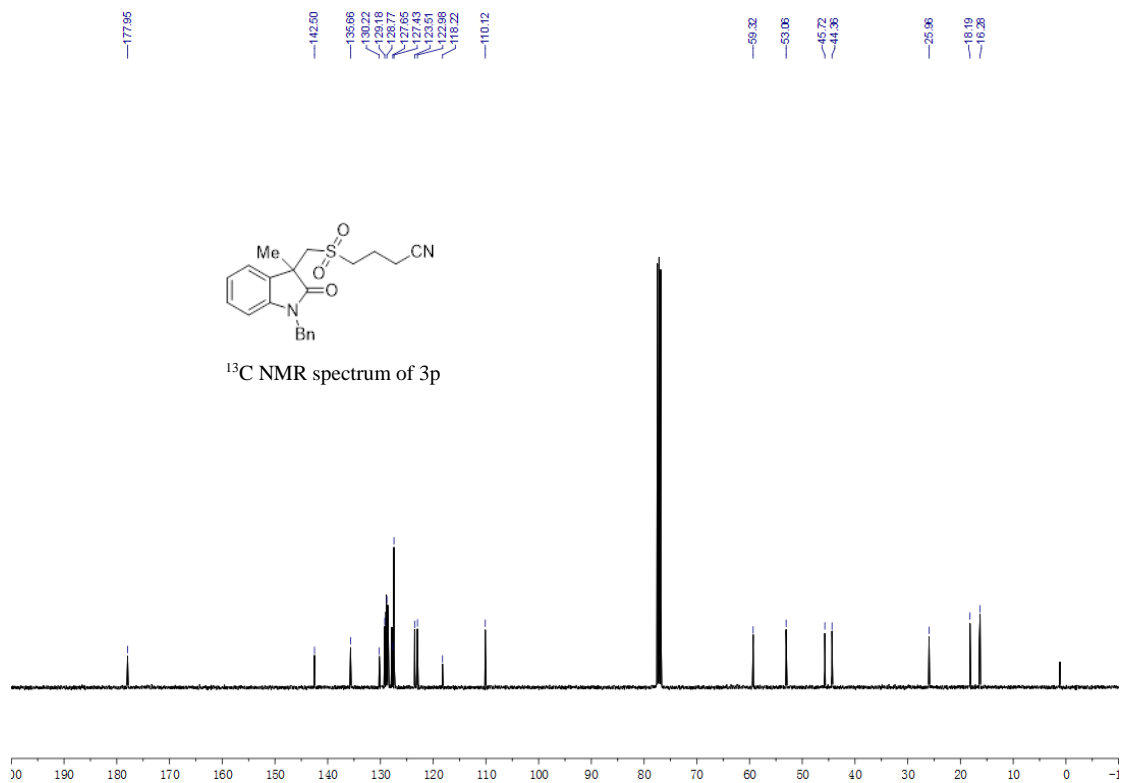

**4-(((3-benzyl-1-methyl-2-oxindolin-3-yl)methyl)sulfonyl)butanenitrile (3q)**

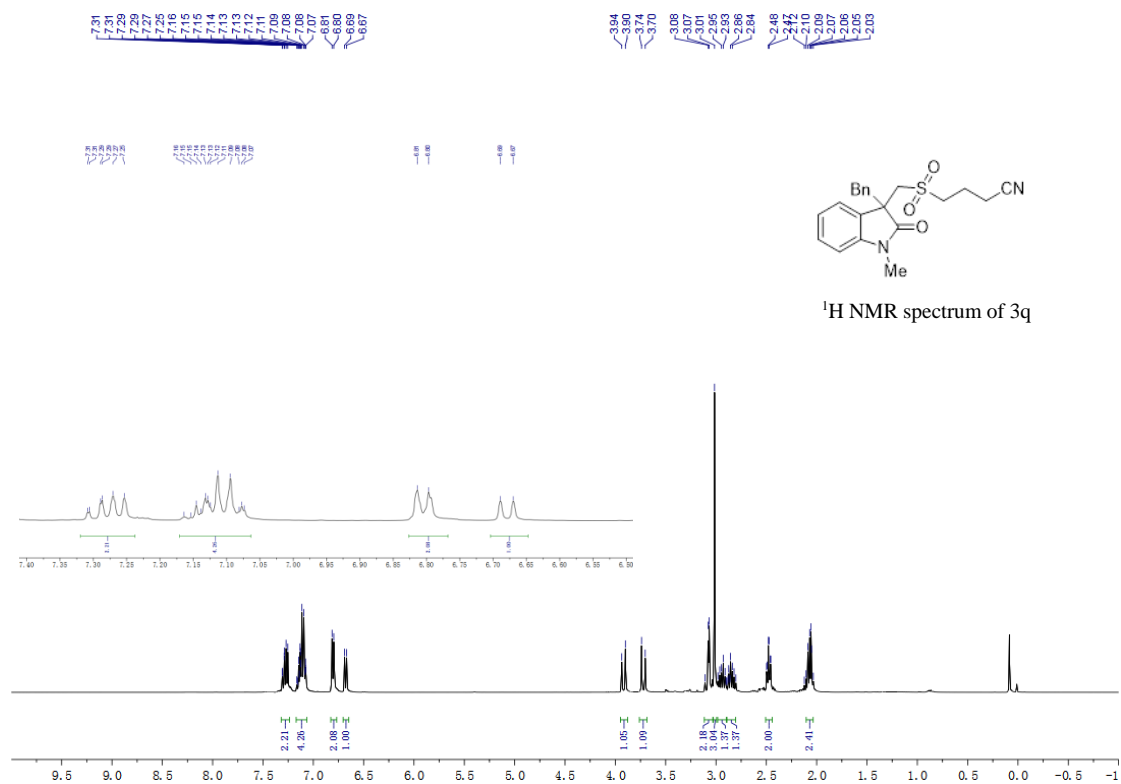

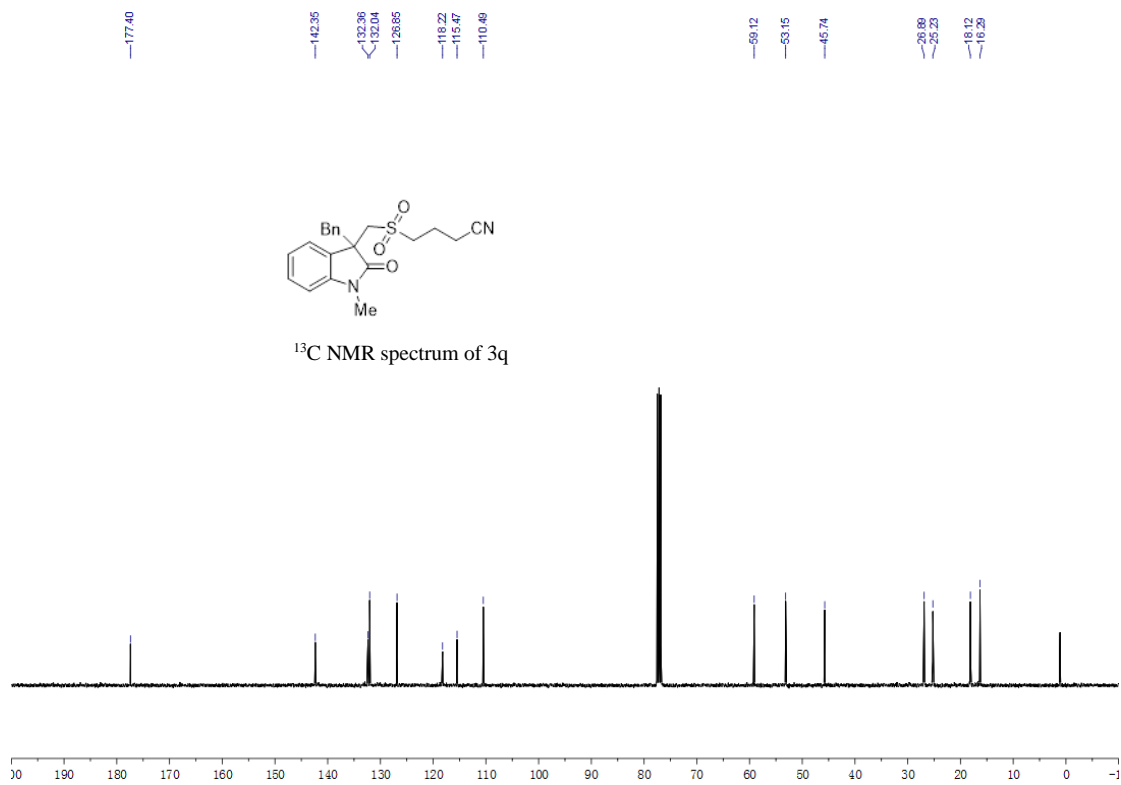

**4-(((1,3,4,6-tetramethyl-2-oxindolin-3-yl)methyl)sulfonyl)butanenitrile (3r)**

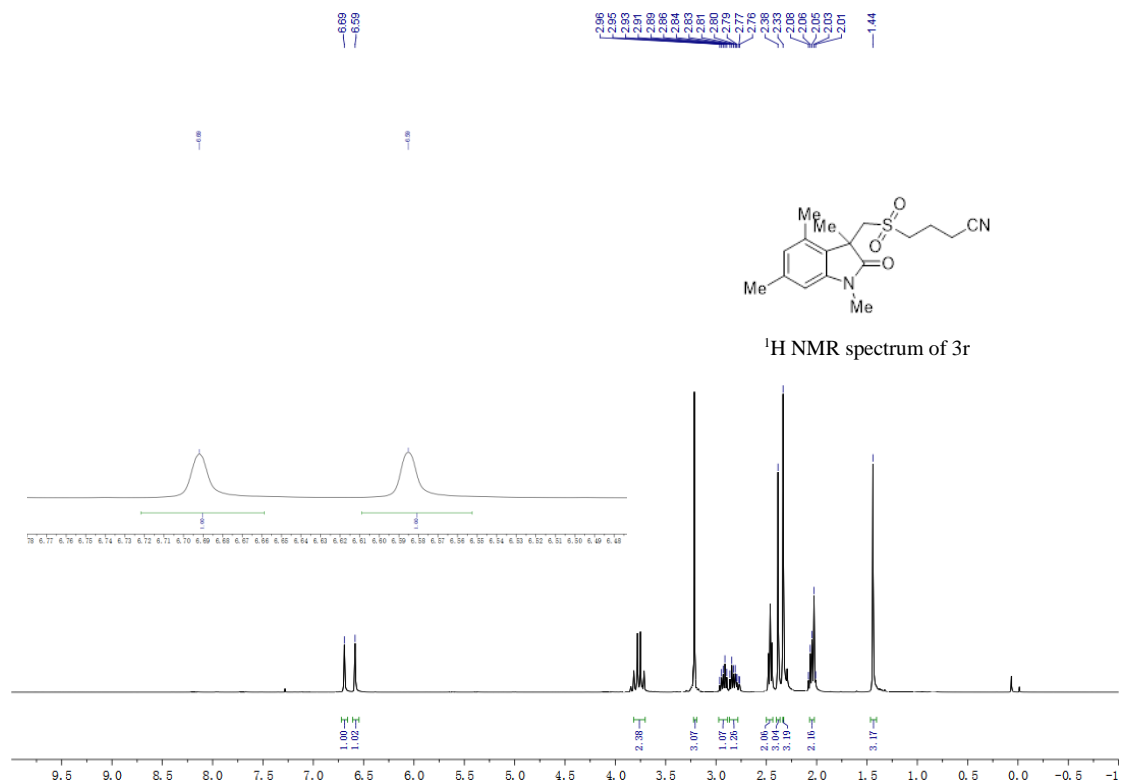

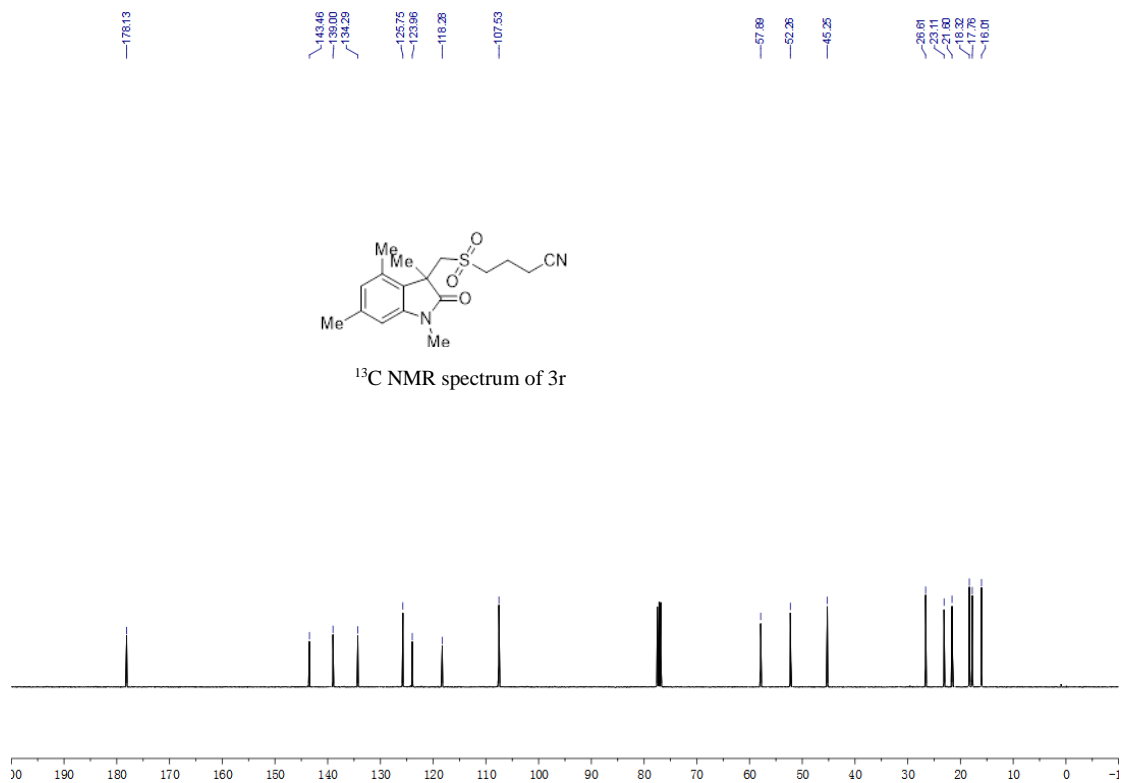

4-(((4,6-dichloro-1,3-dimethyl-2-oxindolin-3-yl)methyl)sulfonyl)butanenitrile (3s)

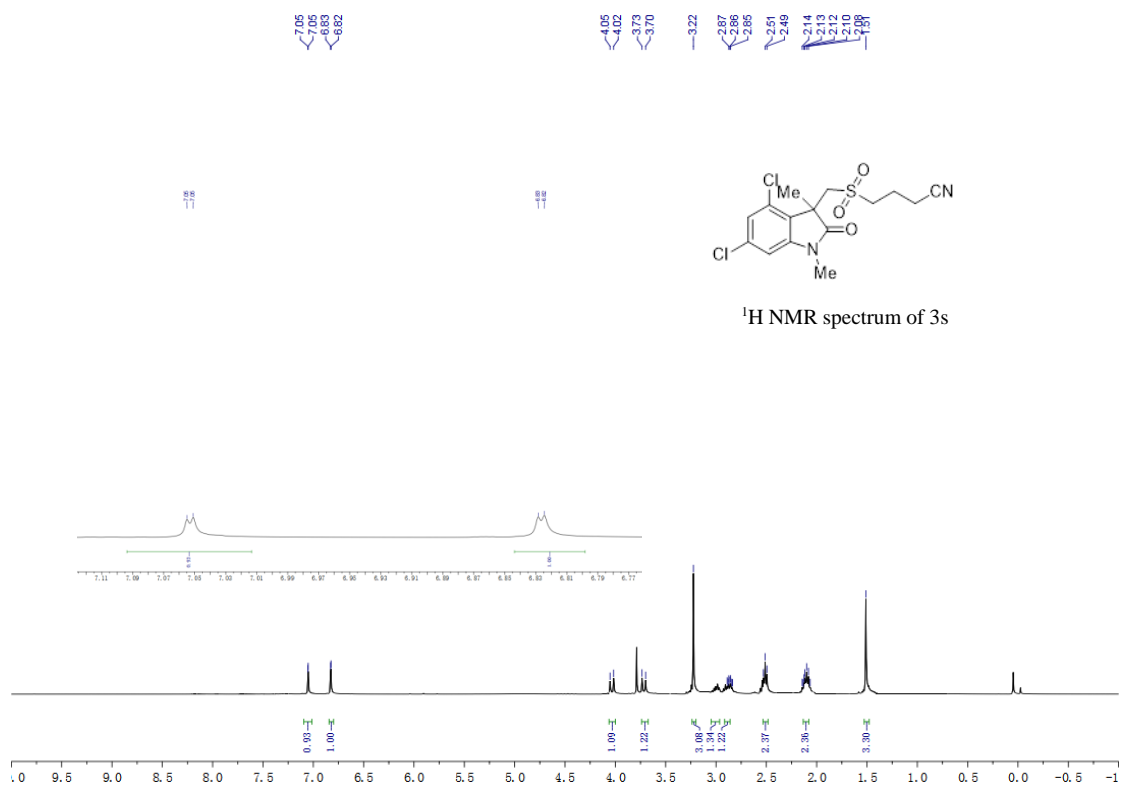

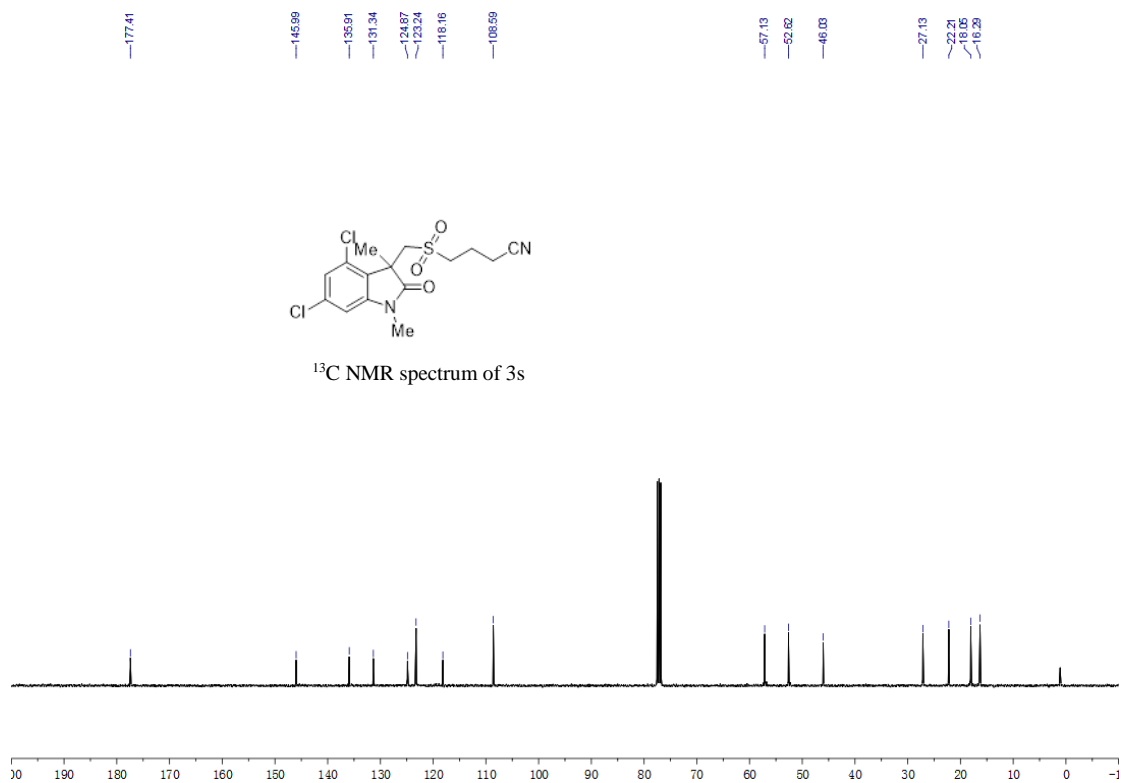

4-(((5,7-dimethyl-6-oxo-6,7-dihydro-5H-[1,3]dioxolo[4,5-f]indol-7-yl)methyl)sulfonyl)butanenitrile (3t)

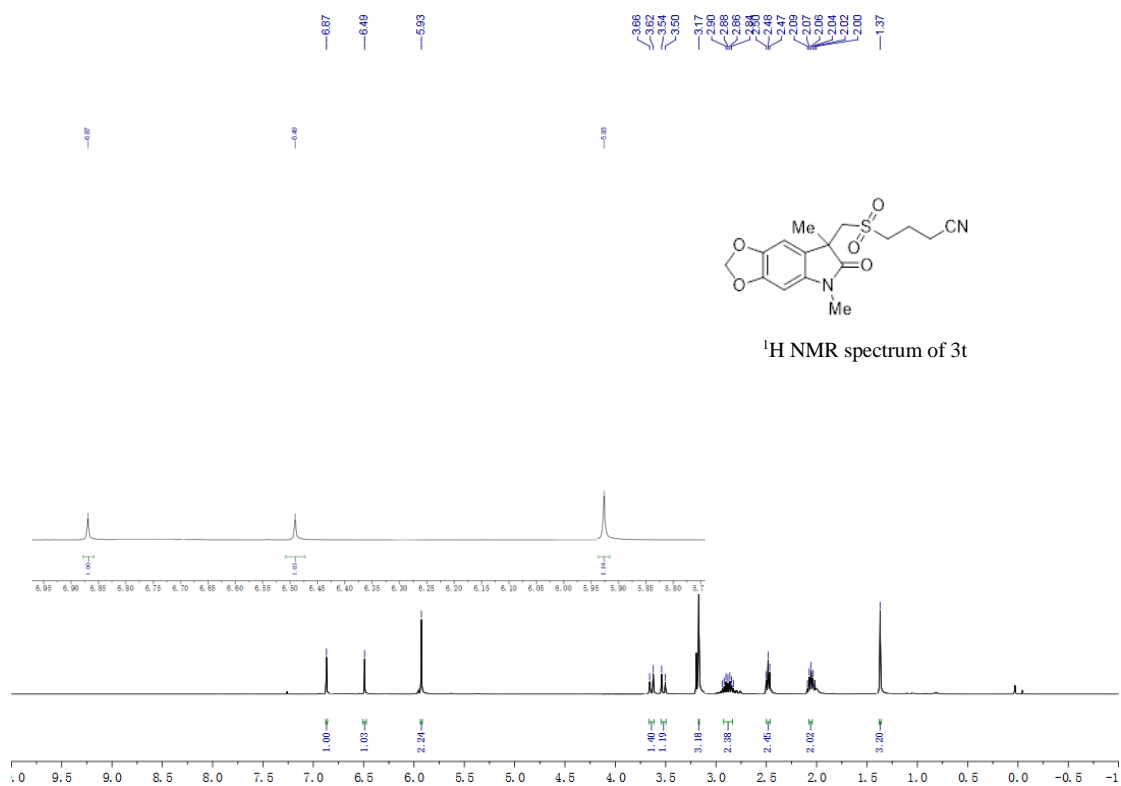

—177.97 —148.11 —143.37 —137.63 —121.54 —118.31 —105.03 —101.37 —92.72 —59.17 —52.81 —45.88 —26.79 —25.23 —17.88 —16.12

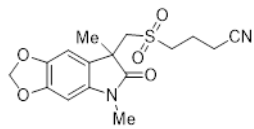

<sup>13</sup>C NMR spectrum of 3t

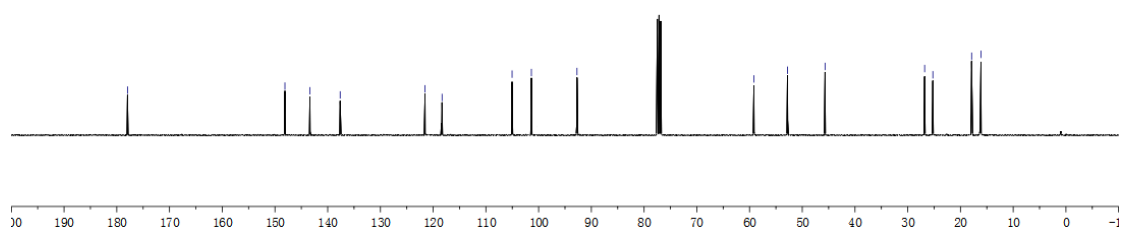

4-(((1-methyl-2-oxo-1,2,5,6-tetrahydro-4H-pyrrolo[3,2,1-ij]quinolin-1-yl)methyl)sulfonyl)butanenitrile (3u)

7.19 7.10 7.08 7.01 7.00 6.96 3.75 3.73 3.72 3.69 3.68 3.59 3.55 2.90 2.79 2.77 2.47 2.45 2.45 2.05 2.05 2.03 2.02 1.45

—7.18 —7.17 —7.16 —7.15 —7.14 —7.13 —7.12

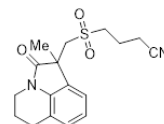

<sup>1</sup>H NMR spectrum of 3u

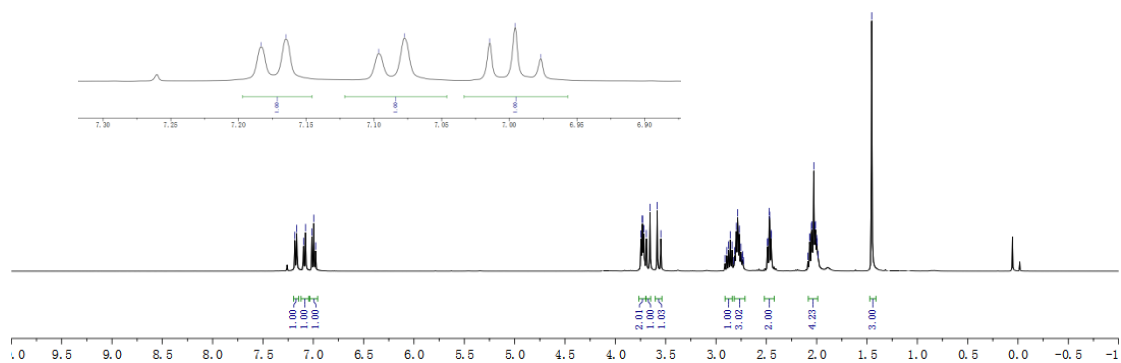

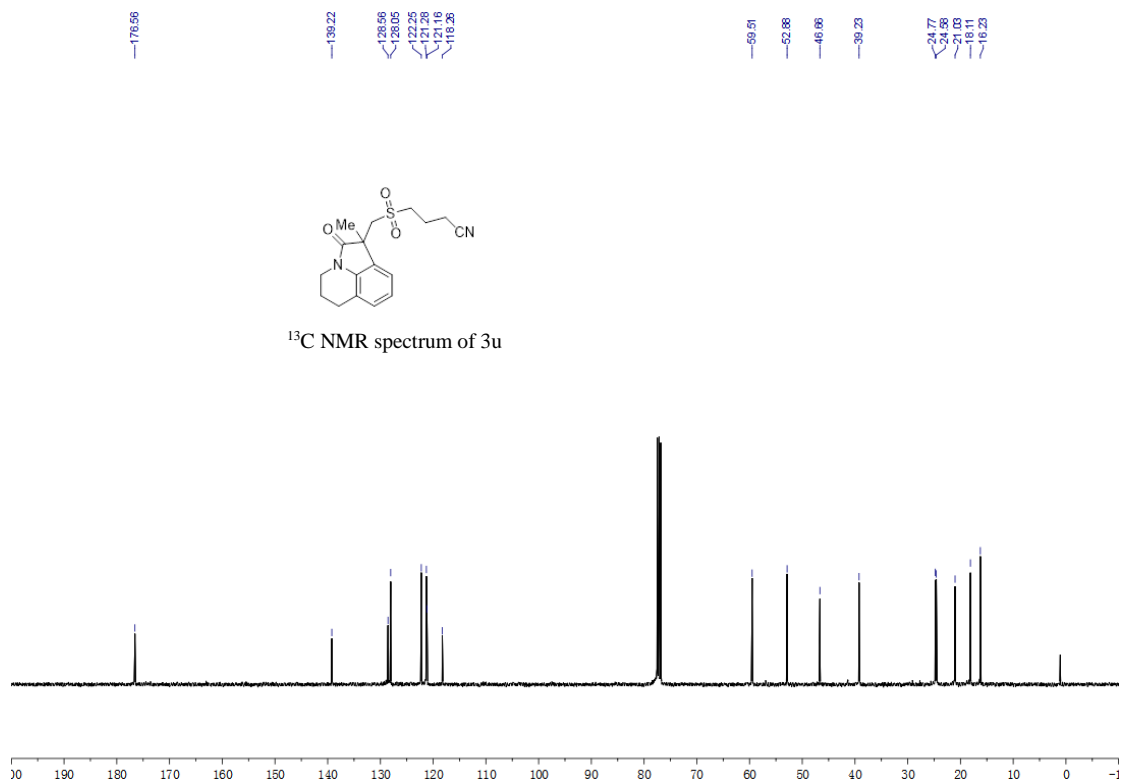

**3-(benzyloxy)-4-(((1,3-dimethyl-2-oxindolin-3-yl)methyl)sulfonyl)butanenitrile (3v)**

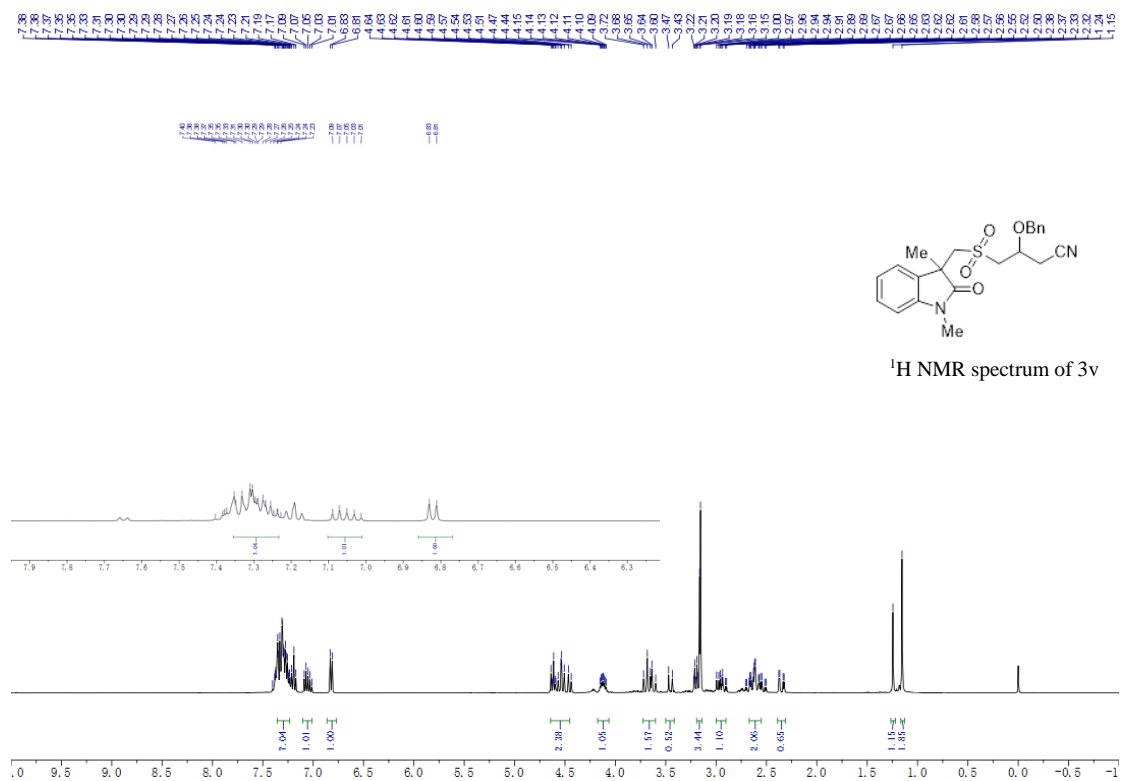





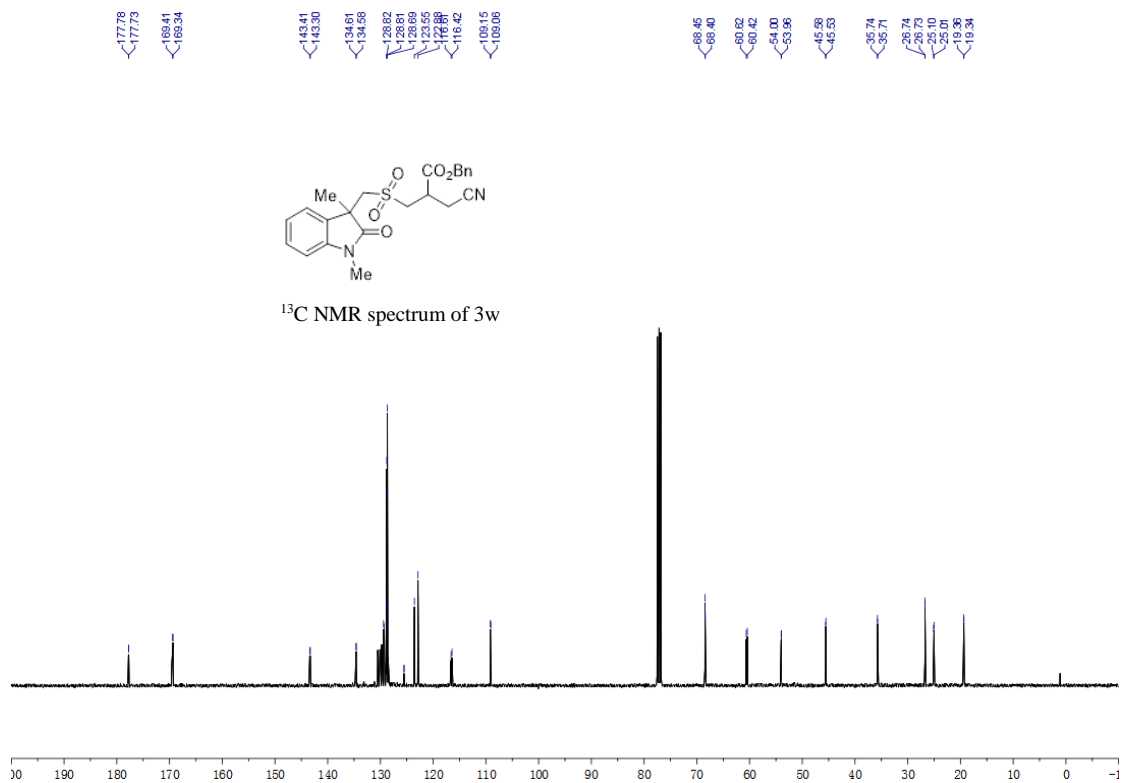

2-(((1,3-dimethyl-2-oxindolin-3-yl)methyl)sulfonyl)methoxy)acetonitrile (3x)

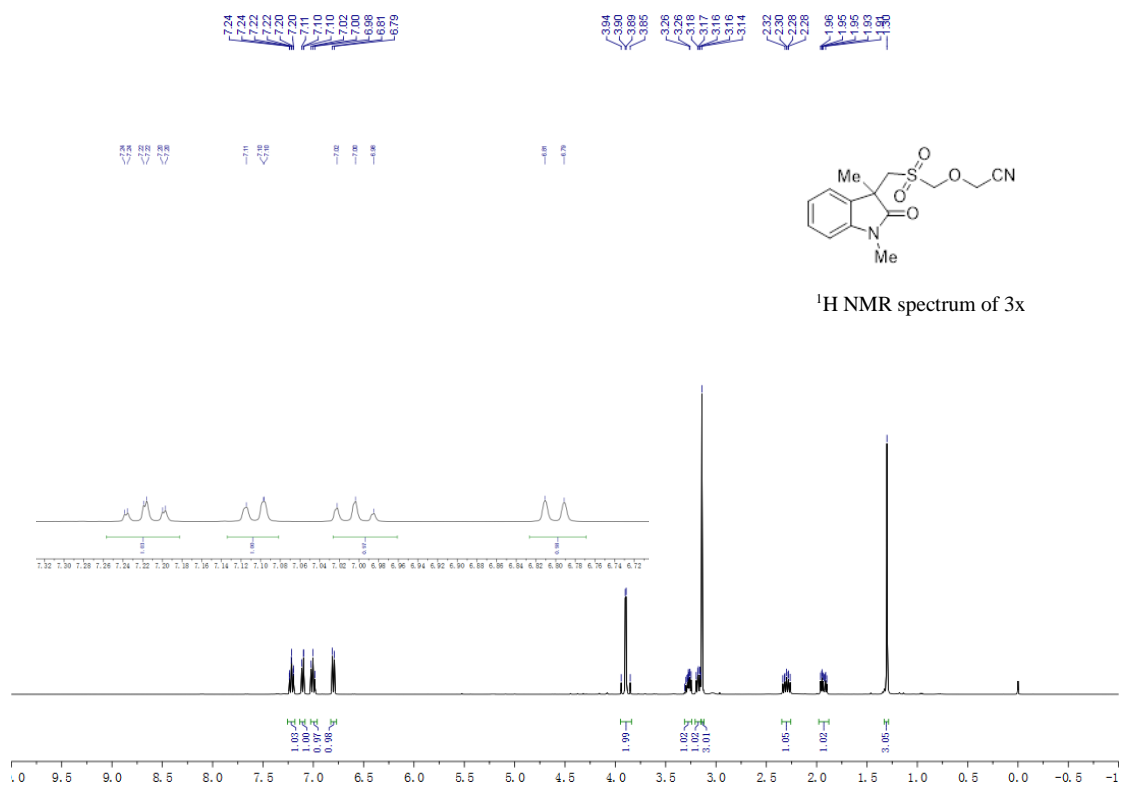

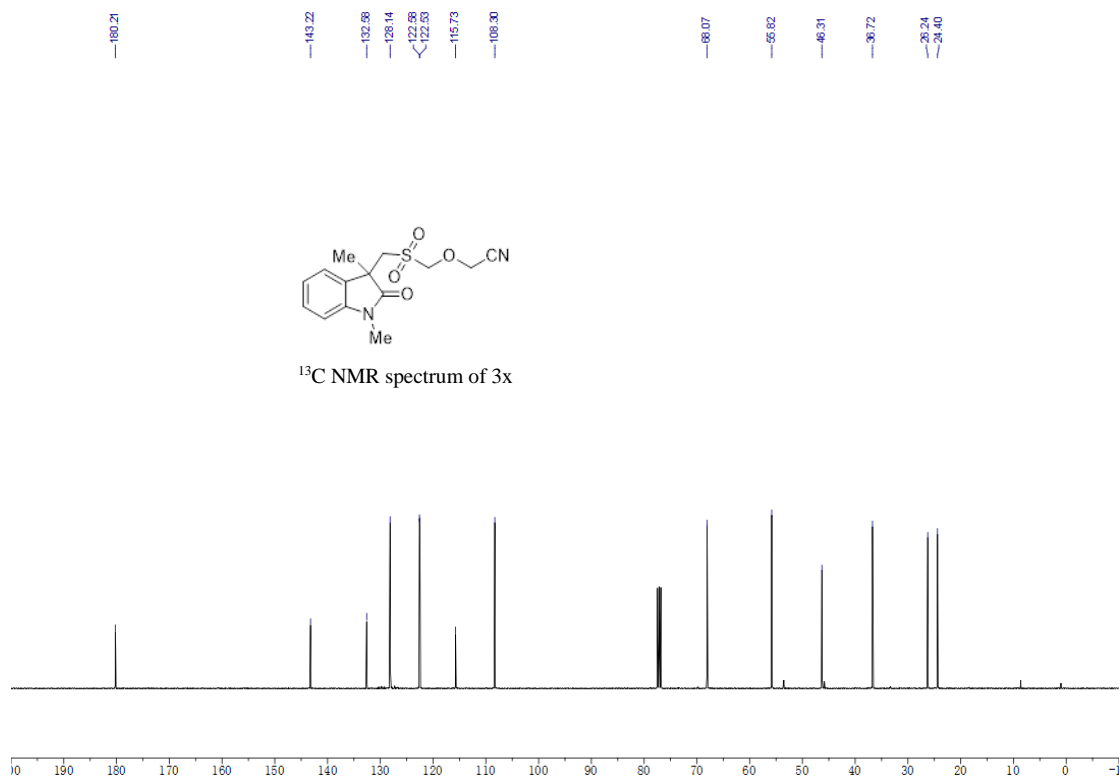

*ethyl 4-(((1,3-dimethyl-2-oxo-2,3-dihydro-1H-benzof[5,4-b]indol-3-yl)methyl)sulfonyl)butanoate (6)*

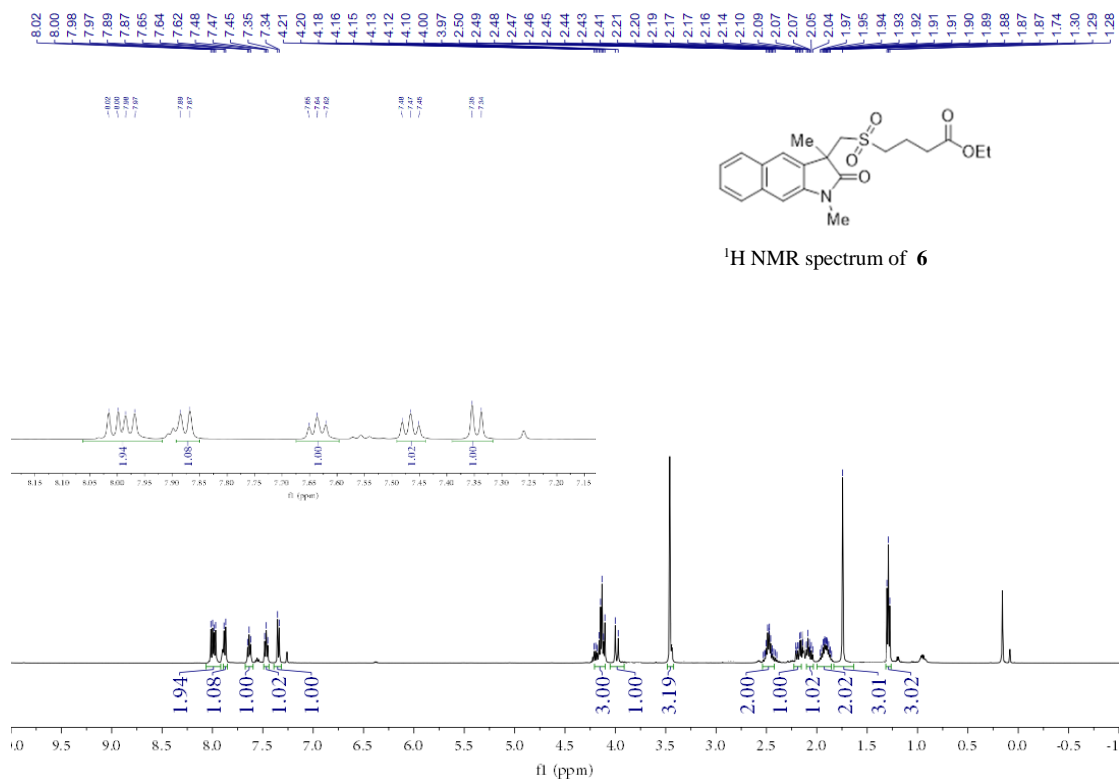

— 179.20  
— 171.94

— 141.74  
— 130.64  
— 130.37  
— 130.23  
— 129.51  
— 128.33  
— 127.83  
— 123.84  
— 121.24  
— 110.26

— 60.89  
— 58.97  
— 53.37  
— 46.50

— 32.11  
— 27.02  
— 24.50  
— 17.49  
— 14.25

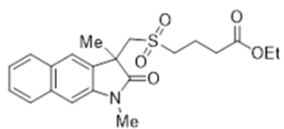

<sup>13</sup>C NMR spectrum of **6**

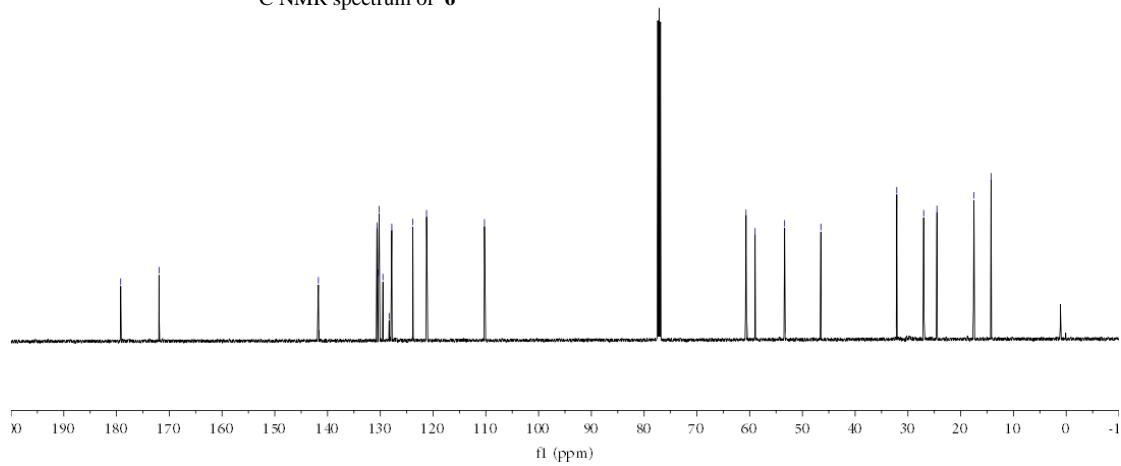

Supplement: d1ob01466h1.pdf [file d1ob01466h1.pdf]
